# Supplementary material for: A MAGIC population-based genome-wide association study reveals functional association of GhRBB1_A07 gene with superior fiber quality in cotton
Source: PubMed Central journal article supplement (PMC5103610; doi:10.1186/s12864-016-3249-2), 2016-11-09
Supplement: 12864_2016_3249_MOESM18_ESM.pdf [file 12864_2016_3249_MOESM18_ESM.pdf]

Additional file 18. Alignment of Acala Ultima (AU) and TM-1 (Ref) alleles of Gh\_A07G2049. Primer locations for *CFBid0004* are highlighted yellow.

|     |            |            |             |             |            |             |             |             |             |      |
|-----|------------|------------|-------------|-------------|------------|-------------|-------------|-------------|-------------|------|
| AU  | AATCTTCATT | TCTTGCTCTC | CTTTGGTGAT  | ATTGGTTTCG  | ATTCTTTTGA | ATGAGATGAT  | TTACCAGTAA  | TTGCCTTCTT  | CATCTTGGAA  | 90   |
| Ref | AATCTTCATT | TCTTGCTCTC | CTTTGGTGAT  | ATTGGTTTCG  | ATTCTTTTGA | ATGAGATGAT  | TTACCAGTAA  | TTGCCTTCTT  | CATCTTGGAA  | 90   |
| AU  | ATCGAATGCT | TCACTTTCGA | TCCAACACCT  | GACAGTATGT  | TATGAGATTT | TTTATGTGGT  | TTAATACCGG  | GTTCTGTCTT  | ACTGTTTTCA  | 180  |
| Ref | ATCGAATGCT | TCACTTTCGA | TCCAACACCT  | GACAGTATGT  | TATGAGATTT | TTTATGTGGT  | TTAATACCGG  | GTTCTGTCTT  | ACTGTTTTCA  | 180  |
| AU  | TCACCTTCAT | CTTCATCTGT | TTTTGCTTCT  | TCCTCTGGTG  | GTTCTTCTTT | GCTTACCAC   | AGTTCCTTTT  | CTTCAATCAC  | ATTTTTAGCT  | 270  |
| Ref | TCACCTTCAT | CTTCATCTGT | TTTTGCTTCT  | TCCTCTGGTG  | GTTCTTCTTT | GCTTACCAC   | AGTTCCTTTT  | CTTCAATCAC  | ATTTTTAGCT  | 270  |
| AU  | CCTTGTAATC | CTCTTGTTGA | TCTTTGGAGT  | AGGTCATACA  | ATGATAGCTT | AGCTGAATCC  | TCTGATTTCAG | GTTCCCTCAGA | TTTTTCAGCA  | 360  |
| Ref | CCTTGTAATC | CTCTTGTTGA | TCTTTGGAGT  | AGGTCATACA  | ATGATAGCTT | AGCTGAATCC  | TCTGATTTCAG | GTTCCCTCAGA | TTTTTCAGCA  | 360  |
| AU  | CCTTCATTCT | CTGGTCTTTT | CTCTTTTCCA  | TTATCGGGTC  | CTGCTTCTGA | ATATATCTCT  | TGAGCATTTC  | TAGGTTCCAA  | ATCTCCAACT  | 450  |
| Ref | CCTTCATTCT | CTGGTCTTTT | CTCTTTTCCA  | TTATCGGGTC  | CTGCTTCTGA | ATATATCTCT  | TGAGCATTTC  | TAGGTTCCAA  | ATCTCCAACT  | 450  |
| AU  | ACAATTTTGT | CTGAGGTTTC | AGAAAGCTTCA | TCCTGCTGTT  | CTGTTGGAAA | CTGTTGCTTG  | CCAATTGAAT  | TTGTTGTCTT  | TTTGCACCTCA | 540  |
| Ref | ACAATTTTGT | CTGAGGTTTC | AGAAAGCTTCA | TCCTGCTGTT  | CTGTTGGAAA | CTGTTGCTTG  | CCAATTGAAT  | TTGTTGTCTT  | TTTGCACCTCA | 540  |
| AU  | ATAGAATCTT | TCTCTCCTGG | AATCTGTTTCG | CCTAAATGTTA | CATTAGTGAT | ATATCTATGC  | TGGACATAGT  | ATGTTATGTA  | ATGACTTATG  | 630  |
| Ref | ATAGAATCTT | TCTCTCCTGG | AATCTGTTTCG | CCTAAATGTTA | CATTAGTGAT | ATATCTATGC  | TGGACATAGT  | ATGTTATGTA  | ATGACTTATG  | 630  |
| AU  | TTTAGACTCC | ATGGATGGAC | CTTGAAAAGG  | ATTCTTTTAG  | AGCCCTCTTA | AACTACATTA  | AGCTTGAAGT  | TGTTTCATTG  | CCTTACTCAT  | 720  |
| Ref | TTTAGACTCC | ATGGATGGAC | CTTGAAAAGG  | ATTCTTTTAG  | AGCCCTCTTA | AACTACATTA  | AGCTTGAAGT  | TGTTTCATTG  | CCTTACTCAT  | 720  |
| AU  | AATGTGATAT | CATTTTTCTT | ACTAGATTCT  | TACCTCCTCT  | ACTATAGTGG | CTTCTTTTCAT | GTCATCCTTC  | ACAGTTTCAT  | CTTTAGCAAC  | 810  |
| Ref | AATGTGATAT | CATTTTTCTT | ACTAGATTCT  | TACCTCCTCT  | ACTATAGTGG | CTTCTTTTCAT | GTCATCCTTC  | ACAGTTTCAT  | CTTTAGCAAC  | 810  |
| AU  | GGTCTCTTTC | TTGATATTGT | CTCTTGCAGC  | ATCCTTTGGA  | GTTTCCAAGG | TGGGCTGTTG  | TGAATTTAAG  | ATTCAAGATC  | AAAAGAGAAG  | 900  |
| Ref | GGTCTCTTTC | TTGATATTGT | CTCTTGCAGC  | ATCCTTTGGA  | GTTTCCAAGG | TGGGCTGTTG  | TGAATTTAAG  | ATTCAAGATC  | AAAAGAGAAG  | 900  |
| AU  | AGGCAAGAAA | AGAACCAAAA | GATTATAGAT  | GAGCATTTTCG | AGAAGTACC  | TTTTCATTTT  | GAATTTTCAT  | TGTTGGGACT  | TGAAAGGTTT  | 990  |
| Ref | AGGCAAGAAA | AGAACCAAAA | GATTATAGAT  | GAGCATTTTCG | AGAAGTACC  | TTTTCATTTT  | GAATTTTCAT  | TGTTGGGACT  | TGAAAGGTTT  | 990  |
| AU  | CTTTTGTTTT | GTCTCCAGTA | TGTTTATCTT  | CTTTGCTGCC  | ATCTTCAAAA | TGAGAAATCA  | GGTCCCTCATT | GATCTGTCAA  | GATTGCTCCC  | 1080 |
| Ref | CTTTTGTTTT | GTCTCCAGTA | TGTTTATCTT  | CTTTGCTGCC  | ATCTTCAAAA | TGAGAAATCA  | GGTCCCTCATT | GATCTGTCAA  | GATTGCTCCC  | 1080 |
| AU  | ATTGTTAGCA | GTTGTTGAGT | TCATATATAA  | AGTGTAAAGAG | CAAAACAAA  | AGAAGAGAGA  | AAATGGAACC  | AGTGAAGAGT  | GCATGAAATT  | 1170 |
| Ref | ATTGTTAGCA | GTTGTTGAGT | TCATATATAA  | AGTGTAAAGAG | CAAAACAAA  | AGAAGAGAGA  | AAATGGAACC  | AGTGAAGAGT  | GCATGAAATT  | 1170 |
| AU  | ATTAAGGTTT | AAATTGGATC | TAACCTTTGT  | TTGTGGAGGT  | TGGATAACTA | TAGATTTCTC  | CTCCACAACA  | GATTTTAGCT  | CCTTGTTTTC  | 1260 |
| Ref | ATTAAGGTTT | AAATTGGATC | TAACCTTTGT  | TTGTGGAGGT  | TGGATAACTA | TAGATTTCTC  | CTCCACAACA  | GATTTTAGCT  | CCTTGTTTTC  | 1260 |
| AU  | TTCTGCTCC  | GAGCATATAT | TGTTCTCAAT  | CTTCATATCT  | GAAGAATCTT | TATCTCGAGT  | TTCCACTTCC  | ATCTGTCTT   | TTTTTCTCC   | 1350 |
| Ref | TTCTGCTCC  | GAGCATATAT | TGTTCTCAAT  | CTTCATATCT  | GAAGAATCTT | TATCTCGAGT  | TTCCACTTCC  | ATCTGTCTT   | TTTTTCTCC   | 1350 |
| AU  | TGCATCTACT | GGAGCTGGAT | ATTTATTCTC  | TTGTTTGTCC  | ACAAGAAGAA | ATCGGGAAGC  | ATCAGTTTCA  | TCTTTTGCTT  | CTTTCTCAAT  | 1440 |
| Ref | TGCATCTACT | GGAGCTGGAT | ATTTATTCTC  | TTGTTTGTCC  | ACAAGAAGAA | ATCGGGAAGC  | ATCAGTTTCA  | TCTTTTGCTT  | CTTTCTCAAT  | 1440 |
| AU  | CGTGTCTCGA | GTCAATTGTG | AAGTTCCTTT  | CGTGAAGTTT  | TGCACATGGT | CAGATGATGA  | TATCTTAGTC  | AAATCTTCCA  | TGGATACAGA  | 1530 |
| Ref | CGTGTCTCGA | GTCAATTGTG | AAGTTCCTTT  | CGTGAAGTTT  | TGCACATGGT | CAGATGATGA  | TATCTTAGTC  | AAATCTTCCA  | TGGATACAGA  | 1530 |
| AU  | CTCCTTGATT | ATTTCTTAC  | TTGAATTATT  | TACTGTTTTT  | TCTCCAGCAT | GTTCTATTCC  | TCCTGAATAG  | ATCTCTTTGA  | CATCTCCGAT  | 1620 |
| Ref | CTCCTTGATT | ATTTCTTAC  | TTGAATTATT  | TACTGTTTTT  | TCTCCAGCAT | GTTCTATTCC  | TCCTGAATAG  | ATCTCTTTGA  | CATCTCCGAT  | 1620 |
| AU  | TTCAGCCTTT | TGCGGATCAA | CTCTGTCTTG  | CAAATCTATC  | CGAACATATT | CCCTGACGAC  | CAAACCTTGT  | ATCTCCATGT  | TCTCAATATG  | 1710 |
| Ref | TTCAGCCTTT | TGCGGATCAA | CTCTGTCTTG  | CAAATCTATC  | CGAACATATT | CCCTGACGAC  | CAAACCTTGT  | ATCTCCATGT  | TCTCAATATG  | 1710 |
| AU  | ATCAAATTCC | CTTGAATCT  | GCTTATCAGA  | TGCTGTCTTT  | GTTGTTTCAT | CAGTCTGCTG  | AAATCATTG   | AGTATTTGAT  | TGCCTTCTGC  | 1800 |
| Ref | ATCAAATTCC | CTTGAATCT  | GCTTATCAGA  | TGCTGTCTTT  | GTTGTTTCAT | CAGTCTGCTG  | AAATCATTG   | AGTATTTGAT  | TGCCTTCTGC  | 1800 |
| AU  | AATGGATATT | TTGGAGCTTG | ATTCTTGATA  | AAAGATGAAT  | GAAGAGCTGC | TTAGATTTAT  | GAAGTCAAAC  | AAAACGTTC   | TGTTTCCAAC  | 1890 |
| Ref | AATGGATATT | TTGGAGCTTG | ATTCTTGATA  | AAAGATGAAT  | GAAGAGCTGC | TTAGATTTAT  | GAAGTCAAAC  | AAAACGTTC   | TGTTTCCAAC  | 1890 |
| AU  | TAGAGTTTCA | TTTGCATAAA | ATATTAGGCA  | AAGTTCGAAA  | GGAGGGTTCA | TACTATTGTG  | GTTTCAATCC  | TGACAGCTGA  | AGCTTGGCCT  | 1980 |
| Ref | TAGAGTTTCA | TTTGCATAAA | ATATTAGGCA  | AAGTTCGAAA  | GGAGGGTTCA | TACTATTGTG  | GTTTCAATCC  | TGACAGCTGA  | AGCTTGGCCT  | 1980 |
| AU  | CGATCCTCAA | CAACTGCATT | TTTGATCTGC  | TTTTCGATTA  | TCTCATTCTC | ACTGGTCTTT  | TGAGCTTCCA  | CAATGAAGT   | TTATAGATCA  | 2070 |
| Ref | CGATCCTCAA | CAACTGCATT | TTTGATCTGC  | TTTTCGATTA  | TCTCATTCTC | ACTGGTCTTT  | TGAGCTTCCA  | CAATGAAGT   | TTATAGATCA  | 2070 |
| AU  | AAGGTTCAAT | TTAGATATTA | AAAAACATGA  | GCGAATACGG  | TGAACAAAGT | TTAGTTTCAG  | TTTCTGACC   | TCTTCAAATG  | TATTGTCTTC  | 2160 |
| Ref | AAGGTTCAAT | TTAGATATTA | AAAAACATGA  | GCGAATACGG  | TGAACAAAGT | TTAGTTTCAG  | TTTCTGACC   | TCTTCAAATG  | TATTGTCTTC  | 2160 |
| AU  | AATCGGTTCA | TCCTTACCCA | CATTTTCTCT  | TGCCTCATCT  | TTGATCGGCT | CTTCTGAATG  | GGAAAGTCGAA | TAAGATGCAA  | CCTGTTGATT  | 2250 |
| Ref | AATCGGTTCA | TCCTTACCCA | CATTTTCTCT  | TGCCTCATCT  | TTGATCGGCT | CTTCTGAATG  | GGAAAGTCGAA | TAAGATGCAA  | CCTGTTGATT  | 2250 |

AU TTGGCCACTC AGTTAGTGGT TATCGAAGAC AATAATAGAA AGGAGAATGA ATAAGAAATA CATGCAATTA TTAAGGTTTT GAGCTAGTAT 2340  
 Ref TTGGCCACTC AGTTAGTGGT TATCGAAGAC AATAATAGAA AGGAGAATGA ATAAGAAATA CATGCAATTA TTAAGGTTTT GAGCTAGTAT 2340

AU TGCTTACCTC TTCTTTTGA AACTTCATTCA GTATGATTTT ATTTCCCTTCA TTTGTTTGT CACACTGATT TTCTTACCAG TCTGTCCCAT 2430  
 Ref TGCTTACCTC TTCTTTTGA AACTTCATTCA GTATGATTTT ATTTCCCTTCA TTTGTTTGT CACACTGATT TTCTTACCAG TCTGTCCCAT 2430

AU CTCTTGTCTT GACAATATTC TCTTTGATTG CAGCATCTTT TGTTCCTTCG TTGAGTAGTT CATTGTCAAA AGCCTTTTCA TGTATCTCCC 2520  
 Ref CTCTTGTCTT GACAATATTC TCTTTGATTG CAGCATCTTT TGTTCCTTCG TTGAGTAGTT CATTGTCAAA AGCCTTTTCA TGTATCTCCC 2520

AU TTTTGAATT CGAAGCTTCT TCAACCTCTC CTTTTAGTTC CCGAATCTTC TCGTGACCTT CATCTTCTTT AAATCTGTTT TTAATTTGTTT 2610  
 Ref TTTTGAATT CGAAGCTTCT TCAACCTCTC CTTTTAGTTC CCGAATCTTC TCGTGACCTT CATCTTCTTT AAATCTGTTT TTAATTTGTTT 2610

AU CATCTCGTTG GACCTCAGAA GGCAATACAG AGGTTGTGAT ATGATGGTGG TTAGTTTAC CTCTCAAAAT GGCTTCGGCT TCCTTTATCT 2700  
 Ref CATCTCGTTG GACCTCAGAA GGCAATACAG AGGTTGTGAT ATGATGGTGG TTAGTTTAC CTCTCAAAAT GGCTTCGGCT TCCTTTATCT 2700

AU TGTCCCTTTT CTGGCTTATC TTTTCTCTT TCTTTACTCC ATCAATGTGT CCATTTTACG TTTCTTTTTT CTTTCATATCC TCCTCCTCGG 2790  
 Ref TGTCCCTTTT CTGGCTTATC TTTTCTCTT TCTTTACTCC ATCAATGTGT CCATTTTACG TTTCTTTTTT CTTTCATATCC TCCTCCTCGG 2790

AU TATTGCCAAC TTCATCAACA GTTTTGTGCT TATACTCCTC AAATTGCAAT GTGGCAACCA AATTTGAAAT TTGCTCCTTG GGTTCCTCTG 2880  
 Ref TATTGCCAAC TTCATCAACA GTTTTGTGCT TATACTCCTC AAATTGCAAT GTGGCAACCA AATTTGAAAT TTGCTCCTTG GGTTCCTCTG 2880

AU TTGCGGTAGT CTGAGAACTA GCATTATCAT CTA CTGCAAG AGCTTCATCC TCCTTAAGCT GTTCTTTTTG CAAGGTCACA TCATCTCTAA 2970  
 Ref TTGCGGTAGT CTGAGAACTA GCATTATCAT CTA CTGCAAG AGCTTCATCC TCCTTAAGCT GTTCTTTTTG CAAGGTCACA TCATCTCTAA 2970

AU TATCACTTCG TAAGAAATTT GCTTCTCCA TTTTCTTACA TTCTATCTTC CCGGCTGTAC CAGCAGTCAT TTCATCTTCT TTGACAGCTT 3060  
 Ref TATCACTTCG TAAGAAATTT GCTTCTCCA TTTTCTTACA TTCTATCTTC CCGGCTGTAC CAGCAGTCAT TTCATCTTCT TTGACAGCTT 3060

AU CTAGCCCAAT GGAACCTTCC TTGTGTGAGC TTTTCTCTAC TGTAACTGT GCATCAGAAAG CATCTTCTTC TGTCTTGTCT TTTATGATTT 3150  
 Ref CTAGCCCAAT GGAACCTTCC TTGTGTGAGC TTTTCTCTAC TGTAACTGT GCATCAGAAAG CATCTTCTTC TGTCTTGTCT TTTATGATTT 3150

AU CCCCTTCGCT TGTCTTCTCA TCTTCTGTCT CTTAGTTTC AGGCTCACCA GGTCTTCTCT TTTCAAGCAT TTCAGGTTCC TTCACCTTTT 3240  
 Ref CCCCTTCGCT TGTCTTCTCA TCTTCTGTCT CTTAGTTTC AGGCTCACCA GGTCTTCTCT TTTCAAGCAT TTCAGGTTCC TTCACCTTTT 3240

AU CTTCTTCTTT GCTGGCATCA GCTTCATGCT TTGGGTTCTG AACAGGGAAT TCTAAATACA AAGATTGTTT ATTTGATTCC TCCATTTGAA 3330  
 Ref CTTCTTCTTT GCTGGCATCA GCTTCATGCT TTGGGTTCTG AACAGGGAAT TCTAAATACA AAGATTGTTT ATTTGATTCC TCCATTTGAA 3330

AU GAGCTTGAGC AGCAGCAGTT TCATCGTTTG TTGCATCATT AAGCTCTGA AACTCTTGT TTTCTAAGCA TGTCTCAGCT TTTTCTTTTG 3420  
 Ref GAGCTTGAGC AGCAGCAGTT TCATCGTTTG TTGCATCATT AAGCTCTGA AACTCTTGT TTTCTAAGCA TGTCTCAGCT TTTTCTTTTG 3420

AU CATCAGAAAG ATCTTCTGAA ATCTTGTCCG GACTCATGTC TGCTTCATTT TTTTCTCTT CTTCCATCTT TTCAGCTTTG CTCACATTTT 3510  
 Ref CATCAGAAAG ATCTTCTGAA ATCTTGTCCG GACTCATGTC TGCTTCATTT TTTTCTCTT CTTCCATCTT TTCAGCTTTG CTCACATTTT 3510

AU CTTCTTCGTC CGAAACTAAT GGAGAGCTCG TAGTCTTCTC CTCGGGTTTA TTAGTCTCAA GAGTCTGCTC ACCAGTTATT CCATCTCTG 3600  
 Ref CTTCTTCGTC CGAAACTAAT GGAGAGCTCG TAGTCTTCTC CTCGGGTTTA TTAGTCTCAA GAGTCTGCTC ACCAGTTATT CCATCTCTG 3600

AU CAACAGCATC TAGCTTTGTG GGTATTTCTT CTTTGTGTTT GCCATATTTT ATCTCCTCAT TTATGGCTCC AGTTCATATG TCGCTTTCCT 3690  
 Ref CAACAGCATC TAGCTTTGTG GGTATTTCTT CTTTGTGTTT GCCATATTTT ATCTCCTCAT TTATGGCTCC AGTTCATATG TCGCTTTCCT 3690

AU TGAAGCCAA TGTGAAAAT GTAGTTTGA TTTTCTCTC CGGTTCCACA TTAGGAAGAC CCTCATCAGC AATTGTCTCT ACTGCTTTAA 3780  
 Ref TGAAGCCAA TGTGAAAAT GTAGTTTGA TTTTCTCTC CGGTTCCACA TTAGGAAGAC CCTCATCAGC AATTGTCTCT ACTGCTTTAA 3780

AU GCTCTCCCTT TCTTTCATTT GGCAAGCGTA CCTCTTCTAT TCTCTTGTG TCAGAAGAAAT CTTCTCGGCT CTCGTGTTTT ATTTAGCAT 3870  
 Ref GCTCTCCCTT TCTTTCATTT GGCAAGCGTA CCTCTTCTAT TCTCTTGTG TCAGAAGAAAT CTTCTCGGCT CTCGTGTTTT ATTTAGCAT 3870

AU CTTCTGGAT CTCTTCTCA ATATTCTCAA TCGGGTTTGC AATTCTGATA TTTTACCCTT CAGAAAGCAA TGTGCAAGCA GAACTTTGAA 3960  
 Ref CTTCTGGAT CTCTTCTCA ATATTCTCAA TCGGGTTTGC AATTCTGATA TTTTACCCTT CAGAAAGCAA TGTGCAAGCA GAACTTTGAA 3960

AU GTTGCTCATC TGGTTTCTCT TCTGGAAGAG TATTGGTTGA ACCAATATCA TCGATGAGAA TAGTTTCAAC TCTTTGAGAG ATGTAATCAG 4050  
 Ref GTTGCTCATC TGGTTTCTCT TCTGGAAGAG TATTGGTTGA ACCAATATCA TCGATGAGAA TAGTTTCAAC TCTTTGAGAG ATGTAATCAG 4050

AU ATGATGTTT AGGTA CTCT TCAATGTCTT CAGTTTTATT GTCTTCCAGT TCTGCTGTTG GGCTTTCTC AGGTTAGCA ACCTGATCTT 4140  
 Ref ATGATGTTT AGGTA CTCT TCAATGTCTT CAGTTTTATT GTCTTCCAGT TCTGCTGTTG GGCTTTCTC AGGTTAGCA ACCTGATCTT 4140

AU TGTGCATGTA AAGTGCATCT GCATCTCTCT TGATTACCTC CACTTCATTG TTGTCAATTA GTGGGACTTC AAGTGCCAAAG TCGGAGGATA 4230  
 Ref TGTGCATGTA AAGTGCATCT GCATCTCTCT TGATTACCTC CACTTCATTG TTGTCAATTA GTGGGACTTC AAGTGCCAAAG TCGGAGGATA 4230

AU TATCTTCAAG CTGCCCCATC TCTACTTCTT TAGTCTTTG ATTGGCATCA TCTTTAATGG TTTCTAGACC CATCTTGACT GAGCTGATAT 4320  
 Ref TATCTTCAAG CTGCCCCATC TCTACTTCTT TAGTCTTTG ATTGGCATCA TCTTTAATGG TTTCTAGACC CATCTTGACT GAGCTGATAT 4320

AU TCAATGTATT TATGAGCTCC TCATTACAG CATCGTTTAA GCTCATCTGT GCTCTTAAAG CTGTGCAAC TTCAATATGA CTCTTCTCAC 4410  
 Ref TCAATGTATT TATGAGCTCC TCATTACAG CATCGTTTAA GCTCATCTGT GCTCTTAAAG CTGTGCAAC TTCAATATGA CTCTTCTCAC 4410

AU GGCAGAGTTT CACGTCATCG ATAATCTCAG CTTTTCTTC TGCTTCTTA TCTTCACTGG ACACTTTTGC TGGATCTGTG GACTCTTCTCAC 4500  
 Ref GGCAGAGTTT CACGTCATCG ATAATCTCAG CTTTTCTTC TGCTTCTTA TCTTCACTGG ACACTTTTGC TGGATCTGTG GACTCTTCTCAC 4500

AU CCTGTCTCCT TTCTTCTAAT TCTTCTATAA TGTGGGATCC TTCTTTGTCA TGGGTTGATT TTCTTTCAAC CTCTGTTTGT TCTGCTTCTA 4590  
 Ref CCTGTCTCCT TTCTTCTAAT TCTTCTATAA TGTGGGATCC TTCTTTGTCA TGGGTTGATT TTCTTTCAAC CTCTGTTTGT TCTGCTTCTA 4590  
 AU TGTGCTCTCT GGACTCAGCT TCCTTGATAC ATTCAGTTGA GACTGAATTG TAGTCTTTTG CCTGTTAAC AATAGTTAAA ATGTTTGAGA 4680  
 Ref TGTGCTCTCT GGACTCAGCT TCCTTGATAC ATTCAGTTGA GACTGAATTG TAGTCTTTTG CCTGTTAAC AATAGTTAAA ATGTTTGAGA 4680  
 AU TTTTGACACA TAAAAAGAAC TATTTTAATA GAAGTATATA ACTATTTATT AAGAATTACT GAGATGACCT TATTTGCTTC ATCTCCTCTT 4770  
 Ref TTTTGACACA TAAAAAGAAC TATTTTAATA GAAGTATATA ACTATTTATT AAGAATTACT GAGATGACCT TATTTGCTTC ATCTCCTCTT 4770  
 AU GATACTGGAG GAATTTTCATT TGTACTACTT TCTTCTCCA TGACATGTTT TTTGATGGCT TCACCTAACAT CAGCTTTTCT AACTTCTTCA 4860  
 Ref GATACTGGAG GAATTTTCATT TGTACTACTT TCTTCTCCA TGACATGTTT TTTGATGGCT TCACCTAACAT CAGCTTTTCT AACTTCTTCA 4860  
 AU TCAACCTGCC AACAAATGATA ATGTAAGTGA AATTCACCTT GAATAAACAT GAAGACAAAA TATCTTACAA GCTCTTTACC TTTTCAGACA 4950  
 Ref TCAACCTGCC AACAAATGATA ATGTAAGTGA AATTCACCTT GAATAAACAT GAAGACAAAA TATCTTACAA GCTCTTTACC TTTTCAGACA 4950  
 AU AAACGACAAAC GTTGGTAAAC TTGTTTTCAT TTTCTTCTCT GTTAATATAG TCTTCATCCT TCAGTTTGTCT TTTCAGTTCC TCTGTAATAT 5040  
 Ref AAACGACAAAC GTTGGTAAAC TTGTTTTCAT TTTCTTCTCT GTTAATATAG TCTTCATCCT TCAGTTTGTCT TTTCAGTTCC TCTGTAATAT 5040  
 AU GTTCCTTGAT TTCTTGACTG GTTTCATCAT CTTGGCTCTT GGTTGCTTCA GGGATTGTTT CATTACTTTG GTCTTCAGCC ACGGGTCCG 5130  
 Ref GTTCCTTGAT TTCTTGACTG GTTTCATCAT CTTGGCTCTT GGTTGCTTCA GGGATTGTTT CATTACTTTG GTCTTCAGCC ACGGGTCCG 5130  
 AU AGTCGGATTT GGGCTTTTCT TCAAAACCTG CTAGTGCTGG CTCAACATTC TGTTCGAAAT TAATACATTA GTCGAGGGCT TGAGAAATCT 5220  
 Ref AGTCGGATTT GGGCTTTTCT TCAAAACCTG CTAGTGCTGG CTCAACATTC TGTTCGAAAT TAATACATTA GTCGAGGGCT TGAGAAATCT 5220  
 AU GCTACTTAAA TGACGAGAAAG CAATTGAATG GTGATAACTG ATATGACAAA CGAACAAAGAT TAGACATACT ATACAACAT ATATTTTCCAT 5310  
 Ref GCTACTTAAA TGACGAGAAAG CAATTGAATG GTGATAACTG ATATGACAAA CGAACAAAGAT TAGACATACT ATACAACAT ATATTTTCCAT 5310  
 AU TATCGTATAC ATATGAAGTT TTGGTTTTG TTTTCTATTG ATAATTTGAT TTGACGAGGT TCTTCATTGA GTTAAACCATT TTCTATACTA 5400  
 Ref TATCGTATAC ATATGAAGTT TTGGTTTTG TTTTCTATTG ATAATTTGAT TTGACGAGGT TCTTCATTGA GTTAAACCATT TTCTATACTA 5400  
 AU AAACCTGAAT CCAGTTTGTCT ATTGGAACGT GAATTCACCA AGTCTGTTGC AGTTCTATT ACATTTACAT TTGCATAAAA TATTATGCTA 5490  
 Ref AAACCTGAAT CCAGTTTGTCT ATTGGAACGT GAATTCACCA AGTCTGTTGC AGTTCTATT ACATTTACAT TTGCATAAAA TATTATGCTA 5490  
 AU ACTTTGAAAG GAGGGTTGAA AGTAGTCTGA CCTCTTCTGT TACTGTTATA GTTTCAATCC TGGAACTGA AGCATGGCTT GGATCCCAA 5580  
 Ref ACTTTGAAAG GAGGGTTGAA AGTAGTCTGA CCTCTTCTGT TACTGTTATA GTTTCAATCC TGGAACTGA AGCATGGCTT GGATCCCAA 5580  
 AU AAGTTTTATC TTCAATCTGG TTTTCAATTA TCTCAATTTT ACTGGTCTTT TGAGCTTCTT GAACGAGCTG TTATAGATT AATATTCAT 5670  
 Ref AAGTTTTATC TTCAATCTGG TTTTCAATTA TCTCAATTTT ACTGGTCTTT TGAGCTTCTT GAACGAGCTG TTATAGATT AATATTCAT 5670  
 AU ATGATTTTAT AATAGAGAAA AAAATGGAAG ATGAACAAAG TTATAGTTTC TGTTCCTTA CCTCTCCAT TGTCTTGCTT TCAGTCGGGT 5760  
 Ref ATGATTTTAT AATAGAGAAA AAAATGGAAG ATGAACAAAG TTATAGTTTC TGTTCCTTA CCTCTCCAT TGTCTTGCTT TCAGTCGGGT 5760  
 AU TTTCTTTAC CTCATCTTCC CCAGAGCCAT CTTTGATCAG CTCTTCCGAA CAGGAAGTTG AATAAGTTGT TTCAGTAACT TTCTTGTCT 5850  
 Ref TTTCTTTAC CTCATCTTCC CCAGAGCCAT CTTTGATCAG CTCTTCCGAA CAGGAAGTTG AATAAGTTGT TTCAGTAACT TTCTTGTCT 5850  
 AU TTTTGACCTG TCAAGTTTGA CCCTTAGTTA ATAGTCATCT AGATAACAT AGAAACGAGA ATACATAGAA AATAGATGAA AAATTTATGA 5940  
 Ref TTTTGACCTG TCAAGTTTGA CCCTTAGTTA ATAGTCATCT AGATAACAT AGAAACGAGA ATACATAGAA AATAGATGAA AAATTTATGA 5940  
 AU TTTTGTAGCT AGTATTGGTT ACCGTTTCTA TCGAAACTTC ATTCAATGGG ATTTCAATTC CTTCAATTTG TTTCTCACAC TGGTTTACTT 6030  
 Ref TTTTGTAGCT AGTATTGGTT ACCGTTTCTA TCGAAACTTC ATTCAATGGG ATTTCAATTC CTTCAATTTG TTTCTCACAC TGGTTTACTT 6030  
 AU CACTCCCCTGA CCCATCCCCTT GCTTTGACAA GATTCTCTTT GATTGCAGCA TCTTCTATTT CAGTGAGTAA TTCATTGCTT AAAGCCTTTT 6120  
 Ref CACTCCCCTGA CCCATCCCCTT GCTTTGACAA GATTCTCTTT GATTGCAGCA TCTTCTATTT CAGTGAGTAA TTCATTGCTT AAAGCCTTTT 6120  
 AU CGGATGTATT CGCTTTGAAA TTTGAGGCTT CCTCAACCTC ACCCGGTTTT TCTTGAATCT TCTCGGGACT CTCATCTTTC GATTCCATGT 6210  
 Ref CGGATGTATT CGCTTTGAAA TTTGAGGCTT CCTCAACCTC ACCCGGTTTT TCTTGAATCT TCTCGGGACT CTCATCTTTC GATTCCATGT 6210  
 AU CATTCAATTC ATCTCCTTGG ACCCTCAGAAG GCAGTGCAGA TGTGTGATA TGAAGGTGAT CAGTTCCAAC TTCCAACACA GGTGTGCTT 6300  
 Ref CATTCAATTC ATCTCCTTGG ACCCTCAGAAG GCAGTGCAGA TGTGTGATA TGAAGGTGAT CAGTTCCAAC TTCCAACACA GGTGTGCTT 6300  
 AU CCTTTATCTC ATCTTTTCT GTGCTTATCT CTTCCACTGT CTTTACTCCA TCAATTTCTC CAATTTTCTG TTCTTCTTCC TTCATATTCT 6390  
 Ref CCTTTATCTC ATCTTTTCT GTGCTTATCT CTTCCACTGT CTTTACTCCA TCAATTTCTC CAATTTTCTG TTCTTCTTCC TTCATATTCT 6390  
 AU CTTCTTCAAG ATTGAGAATC TTCTCCTCAG GTTTCCTGT TGGAAATGTC TGGAAACGAG TATTATTTT TGCTGCAAGA GCTTCACTCT 6480  
 Ref CTTCTTCAAG ATTGAGAATC TTCTCCTCAG GTTTCCTGT TGGAAATGTC TGGAAACGAG TATTATTTT TGCTGCAAGA GCTTCACTCT 6480  
 AU CCTGAAGCAG TTCCTTCTGT AAGATCACAT CTTCTCCATT ATCTTGTGAG AATTCTGCTT CGCCTTTTTT CTCACTTTCT ATCTTCTCAG 6570  
 Ref CCTGAAGCAG TTCCTTCTGT AAGATCACAT CTTCTCCATT ATCTTGTGAG AATTCTGCTT CGCCTTTTTT CTCACTTTCT ATCTTCTCAG 6570  
 AU CTGTACCAGC AGTTGCTTCG TCTTCTGCAA AAGCTTCTAG CTTGACAGAG CTGTCTTTT GTGAGCATAT CTCTGCTGTT GTCTTGCAT 6660  
 Ref CTGTACCAGC AGTTGCTTCG TCTTCTGCAA AAGCTTCTAG CTTGACAGAG CTGTCTTTT GTGAGCATAT CTCTGCTGTT GTCTTGCAT 6660  
 AU CTGAAGCATC TTCTTCACTC CCATCTTTTA TGATTTGCCT ATCGTTTGT TTCTCATCTT CTTTCTCCTT TTTTTCATGC TCTAGCATTT 6750  
 Ref CTGAAGCATC TTCTTCACTC CCATCTTTTA TGATTTGCCT ATCGTTTGT TTCTCATCTT CTTTCTCCTT TTTTTCATGC TCTAGCATTT 6750

AU CACTAGTTAT AGCAGTGGCT GAAATATAAA GTTGCTTGTCT TGAGGAAGAC TGATCAGAAG CAATTTCTTC TTTTTAACT AACTGAAGCT 6840  
 Ref CACTAGTTAT AGCAGTGGCT GAAATATAAA GTTGCTTGTCT TGAGGAAGAC TGATCAGAAG CAATTTCTTC TTTTTAACT AACTGAAGCT 6840

AU CATTAGCTC TTCTGTTACT CCAGCTGATG AGTCTTCATG GTTCCCATTG TGAAAGCTTTT CAGTTTCTTT CCCTTTTTCT TTGTTTGCTT 6930  
 Ref CATTAGCTC TTCTGTTACT CCAGCTGATG AGTCTTCATG GTTCCCATTG TGAAAGCTTTT CAGTTTCTTT CCCTTTTTCT TTGTTTGCTT 6930

AU CAATCTCTTG TGATTCCCTCA GTTAAGGAAG CCTGAGCAAT AATGGTTTCT TGATCTATAA CAGCTTTAGG CTCCTGAGGT CTTCCCTTTT 7020  
 Ref CAATCTCTTG TGATTCCCTCA GTTAAGGAAG CCTGAGCAAT AATGGTTTCT TGATCTATAA CAGCTTTAGG CTCCTGAGGT CTTCCCTTTT 7020

AU CGAGAAGTTC CACTTCCCTC ACCTTTTTCC CCTCTTCTTC ATTGGCCTCA GCTCCATGCT TTAGGTTCTC TTCAGTCAAT TCTGAGGAAG 7110  
 Ref CGAGAAGTTC CACTTCCCTC ACCTTTTTCC CCTCTTCTTC ATTGGCCTCA GCTCCATGCT TTAGGTTCTC TTCAGTCAAT TCTGAGGAAG 7110

AU ACTGACCAGA AGCAATTTCT TCTCTAGTAA CTAATTGAAG CTCATTTAGC TTTTCTGTTT CTCCAGCTGA CGAGTCTTCA AATTTCCCAT 7200  
 Ref ACTGACCAGA AGCAATTTCT TCTCTAGTAA CTAATTGAAG CTCATTTAGC TTTTCTGTTT CTCCAGCTGA CGAGTCTTCA AATTTCCCAT 7200

AU CGTCAAGCTT TTTGGCTTC TCCCTTTTTCT CTTGCTTTGC TTCAATCTTT TGTGATTCCT CTGTTATTGA AGCCTGAAC TATAATGGTTT 7290  
 Ref CGTCAAGCTT TTTGGCTTC TCCCTTTTTCT CTTGCTTTGC TTCAATCTTT TGTGATTCCT CTGTTATTGA AGCCTGAAC TATAATGGTTT 7290

AU CTTGATCCAT AACAGCTTCA GGCTCCTGAG GTCTTTTCTT TTCGAGAATT TCCACTTCTC TCACCTTTTC TTCCTCTTCT TCACTGGCCT 7380  
 Ref CTTGATCCAT AACAGCTTCA GGCTCCTGAG GTCTTTTCTT TTCGAGAATT TCCACTTCTC TCACCTTTTC TTCCTCTTCT TCACTGGCCT 7380

AU CAGCTCCACG CTTTAGGTTT TCAACAGTCA ATTCTGAAGG CAAAGATTGC TCACCTTGATT CCTCCACTTG GGGACATTGA GCAGTGGCAG 7470  
 Ref CAGCTCCACG CTTTAGGTTT TCAACAGTCA ATTCTGAAGG CAAAGATTGC TCACCTTGATT CCTCCACTTG GGGACATTGA GCAGTGGCAG 7470

AU CTTTCATCTTT CTTGGCATCG TCAAGCTCCT GGATTGCTTC TTTTCTGAA CATGTCTCTG CTACTTCTTT TGCATTAATA GAATCTTCTG 7560  
 Ref CTTTCATCTTT CTTGGCATCG TCAAGCTCCT GGATTGCTTC TTTTCTGAA CATGTCTCTG CTACTTCTTT TGCATTAATA GAATCTTCTG 7560

AU AGATATTCTC TGAAAGTGTCT GCTTCACTTA ATTTATCTTC TTCTATCTTC TTAACCGAGC TTACATTTTC TTTCTCTCC TTAGAAACCA 7650  
 Ref AGATATTCTC TGAAAGTGTCT GCTTCACTTA ATTTATCTTC TTCTATCTTC TTAACCGAGC TTACATTTTC TTTCTCTCC TTAGAAACCA 7650

AU ATGGAAGGCT TGTGGTCCCC TCCTTTGGTA TTTTAGTCTC AAGAATCTGC TCACCAGTTA CTTCTTCCAA CTTTTCCACA CTTAGGCCAT 7740  
 Ref ATGGAAGGCT TGTGGTCCCC TCCTTTGGTA TTTTAGTCTC AAGAATCTGC TCACCAGTTA CTTCTTCCAA CTTTTCCACA CTTAGGCCAT 7740

AU TCTCGGCTTC AACAACTCTGA TCTTTGGGCA TGTAAAATGC CTTGAGATCT CTTCTGGTAA TCTCTGCTTC ATCATTGTTG TTAGTTGGGG 7830  
 Ref TCTCGGCTTC AACAACTCTGA TCTTTGGGCA TGTAAAATGC CTTGAGATCT CTTCTGGTAA TCTCTGCTTC ATCATTGTTG TTAGTTGGGG 7830

AU CTTCTGGTGC CAAGTTGGAG GATCTTTCTT CAAGCTGCAC CTTCTCTATT TCTTTGGTCT CTTGATTAGA ATCACTTTCA AGGGTTTCTA 7920  
 Ref CTTCTGGTGC CAAGTTGGAG GATCTTTCTT CAAGCTGCAC CTTCTCTATT TCTTTGGTCT CTTGATTAGA ATCACTTTCA AGGGTTTCTA 7920

AU AACTCATTTT GACTGAAC TG ATATTTGCTG TATTTTCAAG CTCTCATTG ACCTCAGTG TGTTTAAGCT TGTCCCTGCT ATTACTTCTG 8010  
 Ref AACTCATTTT GACTGAAC TG ATATTTGCTG TATTTTCAAG CTCTCATTG ACCTCAGTG TGTTTAAGCT TGTCCCTGCT ATTACTTCTG 8010

AU TCACAGCTTC AATAGGACTC TCTTCATGAC AAAATTTTGA GTCATCAATA ATCTCCTCGA TTTTTTCTC TTCTCTGTCT TCACCGTGCT 8100  
 Ref TCACAGCTTC AATAGGACTC TCTTCATGAC AAAATTTTGA GTCATCAATA ATCTCCTCGA TTTTTTCTC TTCTCTGTCT TCACCGTGCT 8100

AU CCTTTATAGG GTCTCTGGAA TCTTCGTCTT GTCTCCTTTC TTCTATTTCT TTGTAACGC CGGATCCTTC TTTGTCGTTG GTCGAATTTT 8190  
 Ref CCTTTATAGG GTCTCTGGAA TCTTCGTCTT GTCTCCTTTC TTCTATTTCT TTGTAACGC CGGATCCTTC TTTGTCGTTG GTCGAATTTT 8190

AU CTTCAACCTC TGCTTTTATC TGCTTTTGG AGCGAGCTAC CTTAATACAT TCAGTTGAGA CTGCACTGTA GTCTTTGACC TGTCAATACG 8280  
 Ref CTTCAACCTC TGCTTTTATC TGCTTTTGG AGCGAGCTAC CTTAATACAT TCAGTTGAGA CTGCACTGTA GTCTTTGACC TGTCAATACG 8280

AU TAGTTAAGAT GTTTGAGAA TTTGACATATC AAAAGAGCTA TTTGAGTATA AGTATTAATT GTGAATCACT TATCTAACCT CATTAGTTTC 8370  
 Ref TAGTTAAGAT GTTTGAGAA TTTGACATATC AAAAGAGCTA TTTGAGTATA AGTATTAATT GTGAATCACT TATCTAACCT CATTAGTTTC 8370

AU TTCATCTCCT TTTGATACCG GATGAAGTTC ATTTGTGCTA CTTTCTTCTT CCATGACATG TTCTTTAATC TCTTTAATAC CATCGACTTT 8460  
 Ref TTCATCTCCT TTTGATACCG GATGAAGTTC ATTTGTGCTA CTTTCTTCTT CCATGACATG TTCTTTAATC TCTTTAATAC CATCGACTTT 8460

AU CTCAACTTCC TTATCAACCT GCCAAAAATG AATATTTTTT AGTATAACTA AGAAATCTCC TTAATAATC ATGTAGGCAG AATATTCAGA 8550  
 Ref CTCAACTTCC TTATCAACCT GCCAAAAATG AATATTTTTT AGTATAACTA AGAAATCTCC TTAATAATC ATGTAGGCAG AATATTCAGA 8550

AU AGTGTTCCTT ACCTCTTTCAG ACAAATTTAC AGCCTTCGTA ACTACGTTTG TGTGTTGTTT ACTGCTGATG CTGTCTTCAT CTTCCAGTTT 8640  
 Ref AGTGTTCCTT ACCTCTTTCAG ACAAATTTAC AGCCTTCGTA ACTACGTTTG TGTGTTGTTT ACTGCTGATG CTGTCTTCAT CTTCCAGTTT 8640

AU GTCTTTCAGT TCCTCTTTTA TCTGTTCTTC AGTTTCTTGA TTCTGAACGC CAATGCTGAT TTCATCATCT AGGTTTTTGG TGTGTTTAGG 8730  
 Ref GTCTTTCAGT TCCTCTTTTA TCTGTTCTTC AGTTTCTTGA TTCTGAACGC CAATGCTGAT TTCATCATCT AGGTTTTTGG TGTGTTTAGG 8730

AU GATTGTTTCC TTACTTTGAT CTTTCAAGCC TGCTTCTGTT TCAGATTTTG ATTTTTCTC AAAAAGCTG ATTGCTACAT TCTGTTTGA 8820  
 Ref GATTGTTTCC TTACTTTGAT CTTTCAAGCC TGCTTCTGTT TCAGATTTTG ATTTTTCTC AAAAAGCTG ATTGCTACAT TCTGTTTGA 8820

AU ATTGATACAT TAGTTGAGGG CTGAACAAAC TCAGCTACTT AACTAAAGAG AAACAGTTGA GGTGATATGA ACATTTGGAC AAGGTTAGAC 8910  
 Ref ATTGATACAT TAGTTGAGGG CTGAACAAAC TCAGCTACTT AACTAAAGAG AAACAGTTGA GGTGATATGA ACATTTGGAC AAGGTTAGAC 8910

AU ATTATATACA ACTTTGTTTT CCATTATGGT ATATATATAT AATTTTGGT TTTGCTTCT TCAATGATTT GATTTTATGA CGTCTTCAA 9000  
 Ref ATTATATACA ACTTTGTTTT CCATTATGGT ATATATATAT AATTTTGGT TTTGCTTCT TCAATGATTT GATTTTATGA CGTCTTCAA 9000

AU CGAGTTATCA CATTITTTGTG CTA AAAACCTG GAATCTCTTT TGTAAATATGA ACCGATTTCAT GGAATCGACT AGAAAATTGC ACACTTATAC 9090  
 Ref CGAGTTATCA CATTITTTGTG CTA AAAACCTG GAATCTCTTT TGTAAATATGA ACCGATTTCAT GGAATCGACT AGAAAATTGC ACACTTATAC 9090

AU TTCCTATCTG CGTAAAATAT TATGAAAGGT TAAAGGAGGA TTCAATGGTA GGCTAACCTC TTCTGTTACT GATGTGGTTT CAATCTTGAC 9180  
 Ref TTCCTATCTG CGTAAAATAT TATGAAAGGT TAAAGGAGGA TTCAATGGTA GGCTAACCTC TTCTGTTACT GATGTGGTTT CAATCTTGAC 9180

AU AACTGAAGCT TGGCCTGGAT CCTCAACAGT TTTATCTTCA ATCTGGTTTT CAATTATCTC GTTTCCTACTG GTCTTTTGAG TTTCCGCAAT 9270  
 Ref AACTGAAGCT TGGCCTGGAT CCTCAACAGT TTTATCTTCA ATCTGGTTTT CAATTATCTC GTTTCCTACTG GTCTTTTGAG TTTCCGCAAT 9270

AU GAGCTGTTAA GGACAAAGCT TCAGTACAGA TATTGAAAAG AAAGAATATG TAAGATGAAC GAAGTTTAGT TTTCAATTTCC TGACCTCTTC 9360  
 Ref GAGCTGTTAA GGACAAAGCT TCAGTACAGA TATTGAAAAG AAAGAATATG TAAGATGAAC GAAGTTTAGT TTTCAATTTCC TGACCTCTTC 9360

AU ATGTTTCTTG TCTTCAACCA GTTTATCCTT CAGCTCTTCT CCAGAGCCAT CTTTGATCAT CTCTTCCAAA TGGGAAGTTG AATAAGATAT 9450  
 Ref ATGTTTCTTG TCTTCAACCA GTTTATCCTT CAGCTCTTCT CCAGAGCCAT CTTTGATCAT CTCTTCCAAA TGGGAAGTTG AATAAGATAT 9450

AU TTCAGTAACT TCCTTGTTCC CCATAACCTG TCAATTTTCT CTCTCATTTA ATAGTTTTCA CAATAATAAA TTTTAATTGC AAGGAAGTAC 9540  
 Ref TTCAGTAACT TCCTTGTTCC CCATAACCTG TCAATTTTCT CTCTCATTTA ATAGTTTTCA CAATAATAAA TTTTAATTGC AAGGAAGTAC 9540

AU GTGAAATTGT TAAGGTTTTG AGCTAGTTTT GCCTACCTCT TTGTCCAAAT CTTTATCCAC CGTGATTTCA TTTCCCTCAA TTGTTTTCTT 9630  
 Ref GTGAAATTGT TAAGGTTTTG AGCTAGTTTT GCCTACCTCT TTGTCCAAAT CTTTATCCAC CGTGATTTCA TTTCCCTCAA TTGTTTTCTT 9630

AU GCATTGATGT TCTTCACCCT CTGTCTCATC TCTTGCATAG ACAATTTTCT TTTCTGTTGGC AGCATCTTCT GTTTCAGTGA GTAATTCATT 9720  
 Ref GCATTGATGT TCTTCACCCT CTGTCTCATC TCTTGCATAG ACAATTTTCT TTTCTGTTGGC AGCATCTTCT GTTTCAGTGA GTAATTCATT 9720

AU GTCAGAAAGCC CTTTTACATG TCTCCTTGT GAAATTTAAG ACTTCCTCTA TCTCTCTTGT TTGTTCTTGA ATATTCTCTG TACTTTCTTC 9810  
 Ref GTCAGAAAGCC CTTTTACATG TCTCCTTGT GAAATTTAAG ACTTCCTCTA TCTCTCTTGT TTGTTCTTGA ATATTCTCTG TACTTTCTTC 9810

AU TTCCTTCACT TCTGTTTCCA TTGTTTCATT TTCTTTGACC TCAAAAAGCA ATGTAGAGGT TGTAGAATGA AGGTTATCTG TTGATGCTC 9900  
 Ref TTCCTTCACT TCTGTTTCCA TTGTTTCATT TTCTTTGACC TCAAAAAGCA ATGTAGAGGT TGTAGAATGA AGGTTATCTG TTGATGCTC 9900

AU ACCTGGAACA ATATGAAGT CAGCTGCTCT ATCTTCCAAG GCATCTTGAA GCTCTTTTGT GCTCTTTGAT TGTGAGCTTT CTTTCTTTC 9990  
 Ref ACCTGGAACA ATATGAAGT CAGCTGCTCT ATCTTCCAAG GCATCTTGAA GCTCTTTTGT GCTCTTTGAT TGTGAGCTTT CTTTCTTTC 9990

AU AAATGATTCT GCCTTTATTT TCTGTTCTTC TATAACAGCT CCATGCTCCT CCGATTCCCT GGATATAACC TCACTAATAA TTGTTTCACC 10080  
 Ref AAATGATTCT GCCTTTATTT TCTGTTCTTC TATAACAGCT CCATGCTCCT CCGATTCCCT GGATATAACC TCACTAATAA TTGTTTCACC 10080

AU TTCCAACATG GCTTCAGGTT CATTGTGCT ACTTTCTTCC TCCATGACCT GTTCTTTAGT ATCTTCACCA CCATCAGCCT GCTAAAGTTA 10170  
 Ref TTCCAACATG GCTTCAGGTT CATTGTGCT ACTTTCTTCC TCCATGACCT GTTCTTTAGT ATCTTCACCA CCATCAGCCT GCTAAAGTTA 10170

AU ACTTTTGTCA ATCAACAGAA ATAAATCTTC TTA AAAAGTC ATATAGGCAA AGTATTTATA AGTGTCTTT ACCTCTCTAG ACACAACCTT 10260  
 Ref ACTTTTGTCA ATCAACAGAA ATAAATCTTC TTA AAAAGTC ATATAGGCAA AGTATTTATA AGTGTCTTT ACCTCTCTAG ACACAACCTT 10260

AU ATTTGTGTTT TTGTCTTTGT TAACACTGTC TTCATCCTTA AGTTTGTCT TCTGTTCCCT TTTTATTTGA TTTTCAGTTT CTTTATTTTG 10350  
 Ref ATTTGTGTTT TTGTCTTTGT TAACACTGTC TTCATCCTTA AGTTTGTCT TCTGTTCCCT TTTTATTTGA TTTTCAGTTT CTTTATTTTG 10350

AU GGCATCGGTG TTGGTTTCGT CATCTTGGTT CTTGGTGTCT TCAGGGATTG GTTCTTGGCT TTGGTCTTCA GCCACTGGTT CTGAGTCAGA 10440  
 Ref GGCATCGGTG TTGGTTTCGT CATCTTGGTT CTTGGTGTCT TCAGGGATTG GTTCTTGGCT TTGGTCTTCA GCCACTGGTT CTGAGTCAGA 10440

AU TTCGGGCTTT TCTTCAGAAC ATGCTAGTGC TAGCTCAACA TTCTGTATGA AATTAATAAG TTAGCCGAGG GCCCCAGAAA TCCACTAAAA 10530  
 Ref TTCGGGCTTT TCTTCAGAAC ATGCTAGTGC TAGCTCAACA TTCTGTATGA AATTAATAAG TTAGCCGAGG GCCCCAGAAA TCCACTAAAA 10530

AU TGAAGAGAAA CAATTGAATG GTGATATGAA CATCTGGACA AGGTTAGACA CTTATAAAAT TTTGGTTTTT TTCTCTTTC AATAATTTGA 10620  
 Ref TGAAGAGAAA CAATTGAATG GTGATATGAA CATCTGGACA AGGTTAGACA CTTATAAAAT TTTGGTTTTT TTCTCTTTC AATAATTTGA 10620

AU TTTTATGAGG TTCTTCAATG GGTTAACTGT GTTCTATACT AAAACCTGAA ATTCTTTTGG TCACTCACAC AGATTCTATA AATTAACCTAG 10710  
 Ref TTTTATGAGG TTCTTCAATG GGTTAACTGT GTTCTATACT AAAACCTGAA ATTCTTTTGG TCACTCACAC AGATTCTATA AATTAACCTAG 10710

AU ACTGTTGCAC AATCTGTTAC GGTTACATTT GCATAAAAATA TTATGAAAAG CATGGAAGGA GGATTCAATG CTGCTTAACC TCTTCTGTTG 10800  
 Ref ACTGTTGCAC AATCTGTTAC GGTTACATTT GCATAAAAATA TTATGAAAAG CATGGAAGGA GGATTCAATG CTGCTTAACC TCTTCTGTTG 10800

AU CTGTTGCGGT TTC AATCCTG GCATCTGAAG CTTGGACTGG ATCCTCAACA GTTTTATCTT CTATTGGATT CTCATTTTCA CTGGTCTTTT 10890  
 Ref CTGTTGCGGT TTC AATCCTG GCATCTGAAG CTTGGACTGG ATCCTCAACA GTTTTATCTT CTATTGGATT CTCATTTTCA CTGGTCTTTT 10890

AU GAGCTTCCAA GATGACCTGT TATAGATTAA AGCTTAACTA CAGATATCAA AAGGCAAAAA ATGAGTAAGA TGAAGAAAAG TTTAGTATTG 10980  
 Ref GAGCTTCCAA GATGACCTGT TATAGATTAA AGCTTAACTA CAGATATCAA AAGGCAAAAA ATGAGTAAGA TGAAGAAAAG TTTAGTATTG 10980

AU CTTACCTTTT CTGTTGAAAC TTCATTCAAT ATGATTTCCC CTGTCTCCGT TCTTGGTTTTG ACAAGTTTCT TGTGGATTGC AGCATCCTCT 11070  
 Ref CTTACCTTTT CTGTTGAAAC TTCATTCAAT ATGATTTCCC CTGTCTCCGT TCTTGGTTTTG ACAAGTTTCT TGTGGATTGC AGCATCCTCT 11070

AU GTTTCATTTA GTA AACTCATT TTCGGAAGCC TTTTTCATGTA TCTCCTTATT GAAATCGGAA GCTTCTCAA TCTCCCTTGT TTGTTCTGGA 11160  
 Ref GTTTCATTTA GTA AACTCATT TTCGGAAGCC TTTTTCATGTA TCTCCTTATT GAAATCGGAA GCTTCTCAA TCTCCCTTGT TTGTTCTGGA 11160

AU ATCTTGTCCG TATTTCTATC TTCTTCCAGT TCTGTTTTCT TCCTTTCATC TCCTTGGACC TCAGATGGCA GCATAGCGGT TGTAAAGATGA 11250  
 Ref ATCTTGTCCG TATTTCTATC TTCTTCCAGT TCTGTTTTCT TCCTTTCATC TCCTTGGACC TCAGATGGCA GCATAGCGGT TGTAAAGATGA 11250

AU <sup>11,260</sup> ATGTGATCTG <sup>11,280</sup> TTGGCAATGT <sup>11,300</sup> GTCAGCAGGA <sup>11,320</sup> TTTGGAAGAT <sup>11,340</sup> CTTTGTGTTT <sup>11,360</sup> TTCTGTCTGG <sup>11,380</sup> ATCACTTCTG <sup>11,400</sup> AAGAAAGCATT <sup>11,420</sup> GTCATCTACT <sup>11,440</sup> 11340  
 Ref ATGTGATCTG TTGGCAATGT GTCAGCAGGA TTTGGAAGAT CTTTGTGTTT TTCTGTCTGG ATCACTTCTG AAGAAAGCATT GTCATCTACT 11340

AU <sup>11,360</sup> GCAAGAGCTT <sup>11,380</sup> CATCCTCTTG <sup>11,400</sup> AAGCCGGTCC <sup>11,420</sup> TTCTGCAAGG <sup>11,440</sup> ATGCATCTTC <sup>11,460</sup> TTCATTATAA <sup>11,480</sup> TCTTGTGTTT <sup>11,500</sup> TCACACTTTC <sup>11,520</sup> TATCATCTCA <sup>11,540</sup> 11430  
 Ref GCAAGAGCTT CATCCTCTTG AAGCCGGTCC TTCTGCAAGG ATGCATCTTC TTCATTATAA TCTTGTGTTT TCACACTTTC TATCATCTCA 11430

AU <sup>11,440</sup> TCTGTTATAG <sup>11,460</sup> TTCTTTTACA <sup>11,480</sup> TTCCTCTTCC <sup>11,500</sup> TTTGAAAGCA <sup>11,520</sup> GTGCAGAGCT <sup>11,540</sup> TGGATTCTGA <sup>11,560</sup> ATCTGTTTCAT <sup>11,580</sup> CTGATGTCTT <sup>11,600</sup> CTCAGTGAGA <sup>11,620</sup> 11520  
 Ref TCTGTTATAG TTCTTTTACA TTCCTCTTCC TTTGAAAGCA GTGCAGAGCT TGGATTCTGA ATCTGTTTCAT CTGATGTCTT CTCAGTGAGA 11520

AU <sup>11,540</sup> GTCTCACTGA <sup>11,560</sup> CTGTCAATTC <sup>11,580</sup> ATCTTCTGCA <sup>11,600</sup> ACAGCTTCTG <sup>11,620</sup> GTTTGAAAGA <sup>11,640</sup> CCTTTCCGGT <sup>11,660</sup> TGTGAGCATA <sup>11,680</sup> TCTTTAATGC <sup>11,700</sup> TGTCTTTTCC <sup>11,720</sup> 11610  
 Ref GTCTCACTGA CTGTCAATTC ATCTTCTGCA ACAGCTTCTG GTTTGAAAGA CCTTTCCGGT TGTGAGCATA TCTTTAATGC TGTCTTTTCC 11610

AU <sup>11,620</sup> TCCTTAGCAT <sup>11,640</sup> CTTCTTGAAT <sup>11,660</sup> CTCGTTTCTT <sup>11,680</sup> ATGAGCTCCC <sup>11,700</sup> CTTCCGTTGT <sup>11,720</sup> TTTCTCATCT <sup>11,740</sup> TCTTTTTCCG <sup>11,760</sup> TGTCAATCATT <sup>11,780</sup> TTTACCATCA <sup>11,800</sup> 11700  
 Ref TCCTTAGCAT CTTCTTGAAT CTCGTTTCTT ATGAGCTCCC CTTCCGTTGT TTTCTCATCT TCTTTTTCCG TGTCAATCATT TTTACCATCA 11700

AU <sup>11,720</sup> TCAAGCTCGA <sup>11,740</sup> GAAATTCTTC <sup>11,760</sup> TTTTTCCAGG <sup>11,780</sup> CATATCTCTG <sup>11,800</sup> TCGTTGTATC <sup>11,820</sup> TGCAACTGAA <sup>11,840</sup> AGATCTTCTG <sup>11,860</sup> AAATCTTGTG <sup>11,880</sup> TGGAAATCATG <sup>11,900</sup> 11790  
 Ref TCAAGCTCGA GAAATTCTTC TTTTTCCAGG CATATCTCTG TCGTTGTATC TGCAACTGAA AGATCTTCTG AAATCTTGTG TGGAAATCATG 11790

AU <sup>11,800</sup> TCTGCTTCAT <sup>11,820</sup> ATATTTTCTC <sup>11,840</sup> TTCTTCTATG <sup>11,860</sup> CGTATATTTT <sup>11,880</sup> CTTTCAATGTC <sup>11,900</sup> TTCTTCAAAA <sup>11,920</sup> ACCAATGGAG <sup>11,940</sup> TGCTTATAGG <sup>11,960</sup> GCCCTCCTTT <sup>11,980</sup> 11880  
 Ref TCTGCTTCAT ATATTTTCTC TTCTTCTATG CGTATATTTT CTTTCAATGTC TTCTTCAAAA ACCAATGGAG TGCTTATAGG GCCCTCCTTT 11880

AU <sup>11,900</sup> GGTTTATTAC <sup>11,920</sup> CTGAGAGAGT <sup>11,940</sup> CTGCTCACC A <sup>11,960</sup> GTTACTACAC <sup>11,980</sup> CTCCTGTAA G <sup>12,000</sup> AACATCTGGT <sup>12,020</sup> TTAGTGGGT A <sup>12,040</sup> CTTCTCCCTT <sup>12,060</sup> TGTTTTTCCA <sup>12,080</sup> 11970  
 Ref GGTTTATTAC CTGAGAGAGT CTGCTCACC A GTTACTACAC CTCCTGTAA G AACATCTGGT TTAGTGGGT A CTTCTCCCTT TGTTTTTCCA 11970

AU <sup>11,980</sup> TATTCTATCG <sup>12,000</sup> CCTCACTGAT <sup>12,020</sup> GTCTCTGGTT <sup>12,040</sup> CCATGCTCAC <sup>12,060</sup> TTTTCTCAGA <sup>12,080</sup> AGGTAATGTT <sup>12,100</sup> GAAGATGTAG <sup>12,120</sup> TTTGAATTTG <sup>12,140</sup> CTCCACTGGT <sup>12,160</sup> 12060  
 Ref TATTCTATCG CCTCACTGAT GTCTCTGGTT CCATGCTCAC TTTTCTCAGA AGGTAATGTT GAAGATGTAG TTTGAATTTG CTCCACTGGT 12060

AU <sup>12,080</sup> CCATCAGTTA <sup>12,100</sup> GAGAAGCCTG <sup>12,120</sup> ATCAGCAATA <sup>12,140</sup> GTTTCTTCTT <sup>12,160</sup> CTGAGACTGC <sup>12,180</sup> TTTAAGTTCT <sup>12,200</sup> GTTTGTTTCAT <sup>12,220</sup> TTGAC AAGCA <sup>12,240</sup> TACCTCTTCT <sup>12,260</sup> 12150  
 Ref CCATCAGTTA GAGAAGCCTG ATCAGCAATA GTTTCTTCTT CTGAGACTGC TTTAAGTTCT GTTTGTTTCAT TTGAC AAGCA TACCTCTTCT 12150

AU <sup>12,160</sup> ATTGCTTTTG <sup>12,180</sup> TTTT CAGATGA <sup>12,200</sup> CTCTCCTCGA <sup>12,220</sup> CACTCTTGTG <sup>12,240</sup> TTATTTTCATC <sup>12,260</sup> ATCCTTCTGC <sup>12,280</sup> ATCTCTTCTT <sup>12,300</sup> CGATCTTTTC <sup>12,320</sup> AACAGGACTT <sup>12,340</sup> 12240  
 Ref ATTGCTTTTG TTTT CAGATGA CTCTCCTCGA CACTCTTGTG TTATTTTCATC ATCCTTCTGC ATCTCTTCTT CGATCTTTTC AACAGGACTT 12240

AU <sup>12,260</sup> GCTTCAGTCT <sup>12,280</sup> CAGAAAGCAA <sup>12,300</sup> TGAGCAATAA <sup>12,320</sup> GAAGTTTGAA <sup>12,340</sup> TTTGCTCCTC <sup>12,360</sup> AAGTTTTACT <sup>12,380</sup> TCTAAAACAG <sup>12,400</sup> TTTT AAGGGA <sup>12,420</sup> ACCCATATGA <sup>12,440</sup> 12330  
 Ref GCTTCAGTCT CAGAAAGCAA TGAGCAATAA GAAGTTTGAA TTTGCTCCTC AAGTTTTACT TCTAAAACAG TTTT AAGGGA ACCCATATGA 12330

AU <sup>12,340</sup> TCTATTTCCC <sup>12,360</sup> CCAGTAGCTC <sup>12,380</sup> AGCTTTTGAA <sup>12,400</sup> ATTTTGGAGG <sup>12,420</sup> CTTCACTCTT <sup>12,440</sup> TGCTCTTACA <sup>12,460</sup> AGCTCATGGT <sup>12,480</sup> CCTGGGTTAG <sup>12,500</sup> GTTGCCAAAC <sup>12,520</sup> 12420  
 Ref TCTATTTCCC CCAGTAGCTC AGCTTTTGAA ATTTTGGAGG CTTCACTCTT TGCTCTTACA AGCTCATGGT CCTGGGTTAG GTTGCCAAAC 12420

AU <sup>12,440</sup> GTTTCTTCTC <sup>12,460</sup> TTTACTTCTG <sup>12,480</sup> TACTGCTTCA <sup>12,500</sup> ATACGACTCT <sup>12,520</sup> CATTATAAGA <sup>12,540</sup> CAAGTTTGAG <sup>12,560</sup> TCATCAATTA <sup>12,580</sup> TCTCCTCAGT <sup>12,600</sup> TTTCTCTTCT <sup>12,620</sup> 12510  
 Ref GTTTCTTCTC TTTACTTCTG TACTGCTTCA ATACGACTCT CATTATAAGA CAAGTTTGAG TCATCAATTA TCTCCTCAGT TTTCTCTTCT 12510

AU <sup>12,520</sup> GCTTCTCGAT <sup>12,540</sup> CTTTCCGCTG <sup>12,560</sup> CAGACTTACA <sup>12,580</sup> GGATCTCTGG <sup>12,600</sup> ACTCCTCATC <sup>12,620</sup> CTGTCTCATT <sup>12,640</sup> TCCTCAAATT <sup>12,660</sup> CTTTGGTGAT <sup>12,680</sup> GTGGGATGCT <sup>12,700</sup> 12600  
 Ref GCTTCTCGAT CTTTCCGCTG CAGACTTACA GGATCTCTGG ACTCCTCATC CTGTCTCATT TCCTCAAATT CTTTGGTGAT GTGGGATGCT 12600

AU <sup>12,620</sup> TCTCCATCAC <sup>12,640</sup> TGGTTAAATA <sup>12,660</sup> TTCTTCAACC <sup>12,680</sup> TGCAAATTTT <sup>12,700</sup> CTGCGACTAT <sup>12,720</sup> CTGCTCTTTG <sup>12,740</sup> GTCTCGACTT <sup>12,760</sup> CCGTGACACA <sup>12,780</sup> TTCAGTTAGG <sup>12,800</sup> 12690  
 Ref TCTCCATCAC TGGTTAAATA TTCTTCAACC TGCAAATTTT CTGCGACTAT CTGCTCTTTG GTCTCGACTT CCGTGACACA TTCAGTTAGG 12690

AU <sup>12,700</sup> ACTGAAC TGT <sup>12,720</sup> AGTCATCCAC <sup>12,740</sup> CTGTGCATAA <sup>12,760</sup> GGTAGTTAAA <sup>12,780</sup> AAGTTTAA CA <sup>12,800</sup> ATATGACATC <sup>12,820</sup> AAAAATGTTA <sup>12,840</sup> TTTGAGTAAC <sup>12,860</sup> TATTCATTTT <sup>12,880</sup> 12780  
 Ref ACTGAAC TGT AGTCATCCAC CTGTGCATAA GGTAGTTAAA AAGTTTAA CA ATATGACATC AAAAATGTTA TTTGAGTAAC TATTCATTTT 12780

AU <sup>12,800</sup> GAACCTGAAA <sup>12,820</sup> AGTGTACTTA <sup>12,840</sup> TTCACTAACC <sup>12,860</sup> TTTGATACTG <sup>12,880</sup> ATTTTCAAT <sup>12,900</sup> AATTTACTTG <sup>12,920</sup> ATTTTGT TTT <sup>12,940</sup> TTAAGAAGAA <sup>12,960</sup> AGAGAGTGAA <sup>12,980</sup> 12870  
 Ref GAACCTGAAA AGTGTACTTA TTCACTAACC TTTGATACTG ATTTTCAAT AATTTACTTG ATTTTGT TTT TTAAGAAGAA AGAGAGTGAA 12870

AU <sup>12,880</sup> AAGAGTAGAA <sup>12,900</sup> TAATTGTTCA <sup>12,920</sup> CTAACCTTTG <sup>12,940</sup> CACTATAAAT <sup>12,960</sup> CGTGATAA CC <sup>12,980</sup> ATCTCAGGAA <sup>13,000</sup> TCTGATTTTC <sup>13,020</sup> TTTTCCATT <sup>13,040</sup> TCAGTCTCTT <sup>13,060</sup> 12960  
 Ref AAGAGTAGAA TAATTGTTCA CTAACCTTTG CACTATAAAT CGTGATAA CC ATCTCAGGAA TCTGATTTTC TTTTCCATT TCAGTCTCTT 12960

AU <sup>12,960</sup> CTTTCAAGCT <sup>13,000</sup> TTCCGGTTTT <sup>13,020</sup> TCTATGTTCT <sup>13,040</sup> TAGCAAGATT <sup>13,060</sup> CTCTTCTCCT <sup>13,080</sup> GTGGCCTTTT <sup>13,100</sup> TGTCACTCTT <sup>13,120</sup> GCTAGTACCC <sup>13,140</sup> AAGGTTGCTT <sup>13,160</sup> 13050  
 Ref CTTTCAAGCT TTCCGGTTTT TCTATGTTCT TAGCAAGATT CTCTTCTCCT GTGGCCTTTT TGTCACTCTT GCTAGTACCC AAGGTTGCTT 13050

AU <sup>13,060</sup> CCAAATCCAT <sup>13,080</sup> GGCTCCATCC <sup>13,100</sup> AATGGCTTTT <sup>13,120</sup> CATCTTCAAAA <sup>13,140</sup> TTTTGATCTT <sup>13,160</sup> TCCAGTCCTA <sup>13,180</sup> CATCTGATGA <sup>13,200</sup> ATTTTCAACT <sup>13,220</sup> GGCAGTGT TTT <sup>13,240</sup> 13140  
 Ref CCAAATCCAT GGCTCCATCC AATGGCTTTT CATCTTCAAAA TTTTGATCTT TCCAGTCCTA CATCTGATGA ATTTTCAACT GGCAGTGT TTT 13140

AU <sup>13,160</sup> CCGCTTCGCA <sup>13,180</sup> TGCCTCGGTT <sup>13,200</sup> TGATTCTCTA <sup>13,220</sup> GTTCTCTATG <sup>13,240</sup> TTCTTCAACA <sup>13,260</sup> CTAGAGTCAT <sup>13,280</sup> CCGTGACCTC <sup>13,300</sup> TAGATTAGAT <sup>13,320</sup> TTCTCCGCCA <sup>13,340</sup> 13230  
 Ref CCGCTTCGCA TGCCTCGGTT TGATTCTCTA GTTCTCTATG TTCTTCAACA CTAGAGTCAT CCGTGACCTC TAGATTAGAT TTCTCCGCCA 13230

AU <sup>13,240</sup> ACTGTTCCTC <sup>13,260</sup> GACTTTCATG <sup>13,280</sup> CTACTTCTAT <sup>13,300</sup> TTCTGTATC <sup>13,320</sup> TTCAGGCTTA <sup>13,340</sup> GCTTTAGGGA <sup>13,360</sup> CATCTACTAG <sup>13,380</sup> TGGATTATCT <sup>13,400</sup> TCAGTTAGAA <sup>13,420</sup> 13320  
 Ref ACTGTTCCTC GACTTTCATG CTACTTCTAT TTCTGTATC TTCAGGCTTA GCTTTAGGGA CATCTACTAG TGGATTATCT TCAGTTAGAA 13320

AU <sup>13,340</sup> TTGATTTTTC <sup>13,360</sup> ATCCGTTATT <sup>13,380</sup> TGTGGCACAG <sup>13,400</sup> GAGTTTCTGA <sup>13,420</sup> GTGCTCACTG <sup>13,440</sup> GAACCTGCT <sup>13,460</sup> CTTTTTCTGA <sup>13,480</sup> AGTTTCAATCA <sup>13,500</sup> GTTCTTTTCC <sup>13,520</sup> 13410  
 Ref TTGATTTTTC ATCCGTTATT TGTGGCACAG GAGTTTCTGA GTGCTCACTG GAACCTGCT CTTTTTCTGA AGTTTCAATCA GTTCTTTTCC 13410

AU <sup>13,420</sup> TTTCTTCAAT <sup>13,440</sup> GTGTGTGGCC <sup>13,460</sup> TCATATTCCT <sup>13,480</sup> TCACCTCGTC <sup>13,500</sup> TCCTAATATT <sup>13,520</sup> TCTTTCAAAG <sup>13,540</sup> GAATCTCCTT <sup>13,560</sup> GGTGGTCATC <sup>13,580</sup> TCCAATTGAT <sup>13,600</sup> 13500  
 Ref TTTCTTCAAT GTGTGTGGCC TCATATTCCT TCACCTCGTC TCCTAATATT TCTTTCAAAG GAATCTCCTT GGTGGTCATC TCCAATTGAT 13500

AU CTTCACTTCC CGCATTTGGA ACTTTATCCT GCATTGCATC TTCTTCTTTC CCGATGTCCT TCTCGTGTGT TACGTGAGAG TCCCCTGATT 13590  
 Ref CTTCACTTCC CGCATTTGGA ACTTTATCCT GCATTGCATC TTCTTCTTTC CCGATGTCCT TCTCGTGTGT TACGTGAGAG TCCCCTGATT 13590

AU TCACATCAAG TTCAGCACTG CATGCACCAC TCTGTTTCATG TTCAATTCTT GCTAAGCTGT TCTCTTCGAT GACAACAACA TTTATTTATTT 13680  
 Ref TCACATCAAG TTCAGCACTG CATGCACCAC TCTGTTTCATG TTCAATTCTT GCTAAGCTGT TCTCTTCGAT GACAACAACA TTTATTTATTT 13680

AU CGTTCTTTCC CTTTTGACT TCAGCATGAG CTTTCAGTTTC CTTTTTTTCT TCTGTTTCTG CTACACATGA TGCCGAGGTT TCTTCTTCAA 13770  
 Ref CGTTCTTTCC CTTTTGACT TCAGCATGAG CTTTCAGTTTC CTTTTTTTCT TCTGTTTCTG CTACACATGA TGCCGAGGTT TCTTCTTCAA 13770

AU TGTCCTTTTT GGACTCCTTG AGCTCAAGCG ACAAAC TACA GACATGGTCT TCTTTTCACTT CTATTGGTGT TGTTCCTTCT TTTGACGCCT 13860  
 Ref TGTCCTTTTT GGACTCCTTG AGCTCAAGCG ACAAAC TACA GACATGGTCT TCTTTTCACTT CTATTGGTGT TGTTCCTTCT TTTGACGCCT 13860

AU GTATAATATC AAACAGACTA GAATCATTAT TTGGCTTTTC TGTTCCTCT ATGGGCGCTG TTTCTAGAT GATTTAGTTA CTAGCCTTTA 13950  
 Ref GTATAATATC AAACAGACTA GAATCATTAT TTGGCTTTTC TGTTCCTCT ATGGGCGCTG TTTCTAGAT GATTTAGTTA CTAGCCTTTA 13950

AU AAACAATTGG ATATATATAT TGATGGAAGA CTGAGTTCAG AAACATTGAA TAAGTGGAAA AGTTAAGATG TTAGTGAGTC ATACTATCTA 14040  
 Ref AAACAATTGG ATATATATAT TGATGGAAGA CTGAGTTCAG AAACATTGAA TAAGTGGAAA AGTTAAGATG TTAGTGAGTC ATACTATCTA 14040

AU CTTACCTCTG TTATCGACAC CACTGCTGCA TTCTTCTCTT CTTTCAGTTT TTCTTTTCACT GTATCCGTC A TTAGTGATGT CTGATCTTTC 14130  
 Ref CTTACCTCTG TTATCGACAC CACTGCTGCA TTCTTCTCTT CTTTCAGTTT TTCTTTTCACT GTATCCGTC A TTAGTGATGT CTGATCTTTC 14130

AU TTGTTATCTT CCTCATCTAG AATTTGTTTT TCTGTATTCT CAACGGTGCT GTCTGGTTC AGATTTTTCAG AGACCTGAAT AAAAAGTAAT 14220  
 Ref TTGTTATCTT CCTCATCTAG AATTTGTTTT TCTGTATTCT CAACGGTGCT GTCTGGTTC AGATTTTTCAG AGACCTGAAT AAAAAGTAAT 14220

AU ATTGGGAGAT TGGTGAACCG TGGAGGTTTT CAGCTTCCAA CTTGATCTTA CGACTTACAA AGAAAAAAAA AAAC TTTAT TTAAGAACTA 14310  
 Ref ATTGGGAGAT TGGTGAACCG TGGAGGTTTT CAGCTTCCAA CTTGATCTTA CGACTTACAA AGAAAAAAAA AAAC TTTAT TTAAGAACTA 14310

AU GGCTCTTCAA AATTTTAGAA GTAACATGAA TTTTACCTCT ACTTCAGGTG TGGCTTCATT TTCATTTTCT TCTGTAGCTT TCAGTGAGTC 14400  
 Ref GGCTCTTCAA AATTTTAGAA GTAACATGAA TTTTACCTCT ACTTCAGGTG TGGCTTCATT TTCATTTTCT TCTGTAGCTT TCAGTGAGTC 14400

AU ATTGATGATA GCACATCTT CTTTACAGT CAATGTTGGG CTTTACAAA CCTGCATGAA GAATAAGGTG TACTTTAAT AATAATCTCT 14490  
 Ref ATTGATGATA GCACATCTT CTTTACAGT CAATGTTGGG CTTTACAAA CCTGCATGAA GAATAAGGTG TACTTTAAT AATAATCTCT 14490

AU GAAAGAGATT AAAATTGTTT TAAAAAAGG TTTTAACTG AGTTAGTATT CATTATGCC CTAATTTAG ACCTCTTTGG TTTCTTCTG 14580  
 Ref GAAAGAGATT AAAATTGTTT TAAAAAAGG TTTTAACTG AGTTAGTATT CATTATGCC CTAATTTAG ACCTCTTTGG TTTCTTCTG 14580

AU ATTTAAGTTA TCTTCTACTT TCTCCATGGC ATCCTTTGGT AGTGCATTC TGTTCCTGA CTCCGCACT ATACTCTCTT CTTTGTGTTT 14670  
 Ref ATTTAAGTTA TCTTCTACTT TCTCCATGGC ATCCTTTGGT AGTGCATTC TGTTCCTGA CTCCGCACT ATACTCTCTT CTTTGTGTTT 14670

AU TAAAGCTTCA TTTTCCACTG GTTCAACATC GGAGAACTTG TACTGCTTTT CGTGCTCATT ATCCATTAGT TGTCCACCGA ATGAGACAGT 14760  
 Ref TAAAGCTTCA TTTTCCACTG GTTCAACATC GGAGAACTTG TACTGCTTTT CGTGCTCATT ATCCATTAGT TGTCCACCGA ATGAGACAGT 14760

AU AACATGTAAT TCATCAGCAT TCTCGTTTGG AATCTCAACT TCCACGGTTT CATTACTCTG ACTTGCTTTA GTTTGTAGGT GGTCAAGTTGG 14850  
 Ref AACATGTAAT TCATCAGCAT TCTCGTTTGG AATCTCAACT TCCACGGTTT CATTACTCTG ACTTGCTTTA GTTTGTAGGT GGTCAAGTTGG 14850

AU TGAGTCTTCC CTCGTTTGT CCTCGGATCT CTTGTCATGG TCTTTGTCG ATGTTGCTTC TTCAATGCTT GTGTTTGTGTT CTGCAGTTTC 14940  
 Ref TGAGTCTTCC CTCGTTTGT CCTCGGATCT CTTGTCATGG TCTTTGTCG ATGTTGCTTC TTCAATGCTT GTGTTTGTGTT CTGCAGTTTC 14940

AU GGCACAGATG GCAGTATTGA CATCCTCAGA AACTGCATCT AAAGGACACA CATGGTTCCT CTTTTTGGGT TCATTCTTTT GCTTGAAGCT 15030  
 Ref GGCACAGATG GCAGTATTGA CATCCTCAGA AACTGCATCT AAAGGACACA CATGGTTCCT CTTTTTGGGT TCATTCTTTT GCTTGAAGCT 15030

AU CTCTGGATT TCGTCTTGT GGGAAATTTT CTCTTGATTC TTCTGTACGA CACCAATATT TTCTACTTCA CTAGTTTTTA CTTCAGGCAT 15120  
 Ref CTCTGGATT TCGTCTTGT GGGAAATTTT CTCTTGATTC TTCTGTACGA CACCAATATT TTCTACTTCA CTAGTTTTTA CTTCAGGCAT 15120

AU TGAACAATG GATTCCTTGT CCTCTCTCAT TTCAGACAAT CCCTTTGTTA TGGCCAGCTC CTTGTCTGT ACCTGTATGA CTCTCACATC 15210  
 Ref TGAACAATG GATTCCTTGT CCTCTCTCAT TTCAGACAAT CCCTTTGTTA TGGCCAGCTC CTTGTCTGT ACCTGTATGA CTCTCACATC 15210

AU CACCGCAACG TTTTCTGAGT GCTTGTGTTG ATCTTGATCT TCTTCTGAAG TGTCTCGGC TATTTTCTA TCTTCAATGA GAGTCGTATC 15300  
 Ref CACCGCAACG TTTTCTGAGT GCTTGTGTTG ATCTTGATCT TCTTCTGAAG TGTCTCGGC TATTTTCTA TCTTCAATGA GAGTCGTATC 15300

AU ATATTTTTCC AAAGGCATAG AAGAAATGTT CTTAACATCA TCTCCTAATA CCTCTTTCAA CAGAACTCC TTGGAGGTCA TTTCCATTTG 15390  
 Ref ATATTTTTCC AAAGGCATAG AAGAAATGTT CTTAACATCA TCTCCTAATA CCTCTTTCAA CAGAACTCC TTGGAGGTCA TTTCCATTTG 15390

AU ATTTTCACTT CCTGTGTTTA GAAATTTATC CTGCACTCCA TCTTCTTCT GGGAAATCTC GATGTCCTTC TCACTTGTCA CATATGATTC 15480  
 Ref ATTTTCACTT CCTGTGTTTA GAAATTTATC CTGCACTCCA TCTTCTTCT GGGAAATCTC GATGTCCTTC TCACTTGTCA CATATGATTC 15480

AU TACTGATTTT ACCTCAATTT CTGCACTTTC TAAACCAATC CTTTCTTCT CACCATCAAC AACATTATTT ATTTTCAATCA TTTCTCTTTC 15570  
 Ref TACTGATTTT ACCTCAATTT CTGCACTTTC TAAACCAATC CTTTCTTCT CACCATCAAC AACATTATTT ATTTTCAATCA TTTCTCTTTC 15570

AU TTCTGGTTCA GCTTTAGCTT CTTTAAAGTT TGTTTTTACC GTTTCCGCTG TTTGTGATGT GCAGTCCAAA TCAGCAGTAT TGATTTGTTT 15660  
 Ref TTCTGGTTCA GCTTTAGCTT CTTTAAAGTT TGTTTTTACC GTTTCCGCTG TTTGTGATGT GCAGTCCAAA TCAGCAGTAT TGATTTGTTT 15660

AU GTTTACCCTT GTTTTTCTT CAGTATCCAT TTTGGACTCC TCGAGCTCAA ATGAAGAGCT GCAGACAAGT TCTTCTTTGA ATTTGATTAC 15750  
 Ref GTTTACCCTT GTTTTTCTT CAGTATCCAT TTTGGACTCC TCGAGCTCAA ATGAAGAGCT GCAGACAAGT TCTTCTTTGA ATTTGATTAC 15750





AU TTCTTCTTTG GTGTCGTTTT TGGACTCCTT GAGCTCAAAC TCCGAAC TAC GAGCCTGGTC TTCTTTCACT TCTATTGGTG TTATTTCTTC 18072  
 Ref TTCTTCTTTG GTGTCGTTTT TGGACTCCTT GAGCTCAAAC TCCGAAC TAC GAGCCTGGTC TTCTTTCACT TCTATTGGTG TTATTTCTTC 18090

AU TTTTGA CTCC TGTACAATAT CATACAGACT AGAATTGTTA TTTTGC TTTG CTGTTTCCTC TATGGACACT GTTTCCTCAA TGATTGTGTG 18162  
 Ref TTTTGA CTCC TGTACAATAT CATACAGACT AGAATTGTTA TTTTGC TTTG CTGTTTCCTC TATGGACACT GTTTCCTCAA TGATTGTGTG 18180

AU GCTCGTCTGT AAAACATTGA ATATATAAGT TGATGGAAGA TTGAATTCAG AGCCATTGAA TAAGTGAAA AGTTAAGATG TTAGTGATTG 18252  
 Ref GCTCGTCTGT AAAACATTGA ATATATAAGT TGATGGAAGA TTGAATTCAG AGCCATTGAA TAAGTGAAA AGTTAAGATG TTAGTGATTG 18270

AU ATACAATCTA CTTACCAC TG TTATCGACAC CACTGCTGTA GTATTCTCTT CCTTAGCTTT TTCTTTCTTC GTCTCAGTCA TTAGTGTGTG 18342  
 Ref ATACAATCTA CTTACCAC TG TTATCGACAC CACTGCTGTA GTATTCTCTT CCTTAGCTTT TTCTTTCTTC GTCTCAGTCA TTAGTGTGTG 18360

AU GTGATCCTTC TTGTTGCTTT CCTCCTCTAG AAATTGTTTT TCAGCATTG CTACTGTGTT GTCTGGTTCC AGCTTTTCAC AGACCTGAAC 18432  
 Ref GTGATCCTTC TTGTTGCTTT CCTCCTCTAG AAATTGTTTT TCAGCATTG CTACTGTGTT GTCTGGTTCC AGCTTTTCAC AGACCTGAAC 18450

AU AAAAATAGTA TCAAAGATT GGTGAAACAT GGAGGTTTT AGCTTTCAAC TTGATCTTCA GACTTTCAAA ACAAACAAA AAAATTTCTT 18522  
 Ref AAAAATAGTA TCAAAGATT GGTGAAACAT GGAGGTTTT AGCTTTCAAC TTGATCTTCA GACTTTCAAA ACAAACAAA AAAATTTCTT 18540

AU AAGAACTAGT CTCTGCAAAA TTTTGAAGT AACATGACTG TCACCTCTAC TTCAGGTGAT GCTTCATTTT CATTTTCTTC TGTAGCTTTG 18612  
 Ref AAGAACTAGT CTCTGCAAAA TTTTGAAGT AACATGACTG TCACCTCTAC TTCAGGTGAT GCTTCATTTT CATTTTCTTC TGTAGCTTTG 18630

AU AGTGAGTCAT CAATGATAGT ACATTCTTCC TTCACAATCG ACATTGGACC TTCATGAACC TGCATGAAGA ATAAGGTGTA CTTTTATTAA 18702  
 Ref AGTGAGTCAT CAATGATAGT ACATTCTTCC TTCACAATCG ACATTGGACC TTCATGAACC TGCATGAAGA ATAAGGTGTA CTTTTATTAA 18720

AU TAATTACAAAT GATAGTATCT GAAAGAGATT AAAATTGTTT TAAAAA AAAA AGTTTTAAAC TGAGTTAGTA TTCATTATG CCCTAAATTT 18792  
 Ref TAATTACAAAT GATAGTATCT GAAAGAGATT AAAATTGTTT TAAAAA AAAA AGTTTTAAAC TGAGTTAGTA TTCATTATG CCCTAAATTT 18810

AU ACGCCTCTTT GGTTTCTTCC TGTTTTAAGT TCTCCATGGC ATCCTTTGGT TCATGTTTCT GTGCACTGCA GTTCTCCGAC TGCTGCAGTA 18882  
 Ref ACGCCTCTTT GGTTTCTTCC TGTTTTAAGT TCTCCATGGC ATCCTTTGGT TCATGTTTCT GTGCACTGCA GTTCTCCGAC TGCTGCAGTA 18900

AU TACTCTCTTC TTTGTGTTCT AAAGCTTTCAT TTTCCACTGG TCGAACACTG AGGAGCTCAT ACTGCTTTTC GTGCTCATTG TCCACTAGTT 18972  
 Ref TACTCTCTTC TTTGTGTTCT AAAGCTTTCAT TTTCCACTGG TCGAACACTG AGGAGCTCAT ACTGCTTTTC GTGCTCATTG TCCACTAGTT 18990

AU GTCCAACATA TGAATTCATA ACATGTAAT CATCAGCCTT TTCGTTTGAA ATCTCAACTT CCACGGTTTC ATTAATGTCA CTTGCTTTAG 19062  
 Ref GTCCAACATA TGAATTCATA ACATGTAAT CATCAGCCTT TTCGTTTGAA ATCTCAACTT CCACGGTTTC ATTAATGTCA CTTGCTTTAG 19080

AU TTTGTAGGTG GTCAGTTGGT GAGTCTTCGC TTGTTTCTCC CTCAGATCTC TCGTCATGGT CTTTGACTGA TGTGCTTCT TCGATGCTTG 19152  
 Ref TTTGTAGGTG GTCAGTTGGT GAGTCTTCGC TTGTTTCTCC CTCAGATCTC TCGTCATGGT CTTTGACTGA TGTGCTTCT TCGATGCTTG 19170

AU TGCTTGTTC TGCAGTTTTG GCACAGATGG CAGTATTGAC ATCCTCAGAC ACTGCATCCA AAGGACACGC ATGGTTCTCC TCTTCGGGT 19242  
 Ref TGCTTGTTC TGCAGTTTTG GCACAGATGG CAGTATTGAC ATCCTCAGAC ACTGCATCCA AAGGACACGC ATGGTTCTCC TCTTCGGGT 19260

AU CATTCTTTG CTTGAAGCTC TCCTCCTGGA TTTCTGCTT GTGGAAATTT TCCTCCTGAT TCTTCTGAT GAAACTGATA TTTTCTACTT 19332  
 Ref CATTCTTTG CTTGAAGCTC TCCTCCTGGA TTTCTGCTT GTGGAAATTT TCCTCCTGAT TCTTCTGAT GAAACTGATA TTTTCTACTT 19350

AU CATTAGTTTT TACTTCAGGC ATTGGAACAA TGGATTGCTC GTCCTTTCTC ATTTCTGCTG ATTCCTTTGT TATAGCCAGC TCCTCATCTG 19422  
 Ref CATTAGTTTT TACTTCAGGC ATTGGAACAA TGGATTGCTC GTCCTTTCTC ATTTCTGCTG ATTCCTTTGT TATAGCCAGC TCCTCATCTG 19440

AU TCTCCTGTAC AACTTTTGC TCCACCATAT TTTCAAGGTG TTTGTATAGA GCTTGATCTT CTTCTGAAGT TTCATCAACT ATTTTCTTCT 19512  
 Ref TCTCCTGTAC AACTTTTGC TCCACCATAT TTTCAAGGTG TTTGTATAGA GCTTGATCTT CTTCTGAAGT TTCATCAACT ATTTTCTTCT 19530

AU CTTCAATGAG AGCTGCATCA TTTTCTTCTG AAGGCATAGT CGAACCTTCC TTAACATCAT CTCCTGATAC CTCCTTCAAT GGAATCTCCT 19602  
 Ref CTTCAATGAG AGCTGCATCA TTTTCTTCTG AAGGCATAGT CGAACCTTCC TTAACATCAT CTCCTGATAC CTCCTTCAAT GGAATCTCCT 19620

AU CAATGGTCAT TTCATTGGA TTTTCACTTC CTGCATTGCG CATTTTATCC TGCATTGTAT CTTCTTCTCG GGGAGTCTCG ATGTCCTCAC 19692  
 Ref CAATGGTCAT TTCATTGGA TTTTCACTTC CTGCATTGCG CATTTTATCC TGCATTGTAT CTTCTTCTCG GGGAGTCTCG ATGTCCTCAC 19710

AU TTGTCACACA CAATTTCTCG GATTTTACGT TAATGTCTGC ACTTTTTAAA CCAATCTCAT CATCTTCACC ATCAACAATA TTAGTTATTT 19782  
 Ref TTGTCACACA CAATTTCTCG GATTTTACGT TAATGTCTGC ACTTTTTAAA CCAATCTCAT CATCTTCACC ATCAACAATA TTAGTTATTT 19800

AU CATTCTTTTC CTCTTCTGGT TCAGCTTTAG CTTCTTTTAA GTTTGTTTCT TCCGTTTCTG CTGCTTGTGA TGTGCAGTCC AACTCAGCAT 19872  
 Ref CATTCTTTTC CTCTTCTGGT TCAGCTTTAG CTTCTTTTAA GTTTGTTTCT TCCGTTTCTG CTGCTTGTGA TGTGCAGTCC AACTCAGCAT 19890

AU TACTGATATA TTCTTTTACT GTGGCGGCTT CTTCACTATC CATCTTGGAC TGCTCGAGCT CAGATGAAGA GCTACAGACA AGTTCTTCTT 19962  
 Ref TACTGATATA TTCTTTTACT GTGGCGGCTT CTTCACTATC CATCTTGGAC TGCTCGAGCT CAGATGAAGA GCTACAGACA AGTTCTTCTT 19980

AU TGACTTCAAT TGGAGTTATC TCTTCTTTTG CTGTACCTGA AGCTGCAGTT TCTGATCCTT TACACATCTG TGTGGTAAAC AAAATTTCAA 20052  
 Ref TGACTTCAAT TGGAGTTATC TCTTCTTTTG CTGTACCTGA AGCTGCAGTT TCTGATCCTT TACACATCTG TGTGGTAAAC AAAATTTCAA 20070

AU CATAAACATG AATAATTTCT GGACGATCAC GGACTATATT AAAAAACAAA TTCCAACAAG TCATGAGCCA TCTTTGTGCT AAGTTTCTGA 20142  
 Ref CATAAACATG AATAATTTCT GGACGATCAC GGACTATATT AAAAAACAAA TTCCAACAAG TCATGAGCCA TCTTTGTGCT AAGTTTCTGA 20160

AU ACGGAATTTT TTATTTCTTG AAATCCAAGT TATCTTGAGG TTTGCTAGCC GGCACCAAGT GCCTCATGAC ACCTCCCTTA TTAATGAAC 20232  
 Ref ACGGAATTTT TTATTTCTTG AAATCCAAGT TATCTTGAGG TTTGCTAGCC GGCACCAAGT GCCTCATGAC ACCTCCCTTA TTAATGAAC 20250

AU CTGTTTTTGG CCTTTTCTGA TTTTGATCAG ATAACCTTTT GATGTGGCAT AAGACTTCTG GTTGTGCTAT TTTGCATTGT ACGCATGTGT 20322  
 Ref CTGTTTTTGG CCTTTTCTGA TTTTGATCAG ATAACCTTTT GATGTGGCAT AAGACTTCTG GTTGTGCTAT TTTGCATTGT ACGCATGTGT 20340

AU TTGCCAATAA TGGTATTTTG TTCCATGTCT ATTAATGGAA GTAGTTCGGA ATTATATTAT AAGTTTGAAG TTGAAAGATT AGAGAGTTGT 20412  
 Ref TTGCCAATAA TGGTATTTTG TTCCATGTCT ATTAATGGAA GTAGTTCGGA ATTATATTAT AAGTTTGAAG TTGAAAGATT AGAGAGTTGT 20430

AU ATAATTTTCT TACCTCTTCA ATTGGAATCT GATTATTGTA GGTGTCTTCC TTCTCTAGAA TTTGTTTTCC ATCATTCTCA GCTATGTTGT 20502  
 Ref ATAATTTTCT TACCTCTTCA ATTGGAATCT GATTATTGTA GGTGTCTTCC TTCTCTAGAA TTTGTTTTCC ATCATTCTCA GCTATGTTGT 20520

AU CCGGTTCTAG CTTTTCAGTG ACCTGAATGG AAATATATTG GAAGATTGGT TAAGCATGGA GGTTTCTGCT TTTAGCAAAAT AGATTGAAAT 20592  
 Ref CCGGTTCTAG CTTTTCAGTG ACCTGAATGG AAATATATTG GAAGATTGGT TAAGCATGGA GGTTTCTGCT TTTAGCAAAAT AGATTGAAAT 20610

AU TGGGTTAGTA TTCATGATAG GAACTGTTTT GATTACCTCA GCTTCATCCT TGTCACAGT TTCCATATTT AGGTTCTGCT TTTGCAC TTC 20682  
 Ref TGGGTTAGTA TTCATGATAG GAACTGTTTT GATTACCTCA GCTTCATCCT TGTCACAGT TTCCATATTT AGGTTCTGCT TTTGCAC TTC 20700

AU ATCATTGTCA TTAGTTCGGA CATCAGGATC CAATTCGAA GATATCTCTT CAAGCTGCAC ATTCTCTGCT TCTGTCTCTT GAGCATCACT 20772  
 Ref ATCATTGTCA TTAGTTCGGA CATCAGGATC CAATTCGAA GATATCTCTT CAAGCTGCAC ATTCTCTGCT TCTGTCTCTT GAGCATCACT 20790

AU CTTAATATTT CCTACAGTCG TCTCGGCTGA GCTGATATTT GATGCATTTA CAATCTTGTG GGTGTGTTTC AAGCTCGTCT CTGCTGTTAC 20862  
 Ref CTTAATATTT CCTACAGTCG TCTCGGCTGA GCTGATATTT GATGCATTTA CAATCTTGTG GGTGTGTTTC AAGCTCGTCT CTGCTGTTAC 20880

AU TTCTGTTACA GCTTCAATAC AACCTCCTC ATGACACGGT TTCGAGTCAT CAATAATCTC CTCGGTTTTTCTTCTGCTT CTGATCTTT 20952  
 Ref TTCTGTTACA GCTTCAATAC AACCTCCTC ATGACACGGT TTCGAGTCAT CAATAATCTC CTCGGTTTTTCTTCTGCTT CTGATCTTT 20970

AU GCTACACAGA CTTACAGGAT CTCCGGACTC TTCAGCCTGT CCCATTTCTT CTAATTTCTT GGTTGATTTGG GATGCTTCTC CATCATTTGGT 21042  
 Ref GCTACACAGA CTTACAGGAT CTCCGGACTC TTCAGCCTGT CCCATTTCTT CTAATTTCTT GGTTGATTTGG GATGCTTCTC CATCATTTGGT 21060

AU TGAATGTTCT TTGACCTCCA AGTTTTCTGC AACTATCTGC TCTTTGGAAT CGGCTTCCAT GGAACATTCA GTTGAGACTG AACTATAGTC 21132  
 Ref TGAATGTTCT TTGACCTCCA AGTTTTCTGC AACTATCTGC TCTTTGGAAT CGGCTTCCAT GGAACATTCA GTTGAGACTG AACTATAGTC 21150

AU TGCCACCCTGC GCATAACATA GTTACAATGT TTAACAATAT AACATCCAAA ATCTGTTTTG AGTATCTATT CATTTTGAAA ATGAAAAGTG 21222  
 Ref TGCCACCCTGC GCATAACATA GTTACAATGT TTAACAATAT AACATCCAAA ATCTGTTTTG AGTATCTATT CATTTTGAAA ATGAAAAGTG 21240

AU TAATTATTCA GTAACGCTTG ATACCCTTTT TTATATCTTT AATTTGATTT TGTATTTTTA GAAGAAAAAG AGTAAAAAGA GTAGAATATC 21312  
 Ref TAATTATTCA GTAACGCTTG ATACCCTTTT TTATATCTTT AATTTGATTT TGTATTTTTA GAAGAAAAAG AGTAAAAAGA GTAGAATATC 21330

AU TATTCACTAA CCTTTGCATT ATAAGTCATG GTAACCATCT CAGGAATCTG GTTTTCTTTT TCTTTTTTCA CATCTTCTTT CAAGCTTTCA 21402  
 Ref TATTCACTAA CCTTTGCATT ATAAGTCATG GTAACCATCT CAGGAATCTG GTTTTCTTTT TCTTTTTTCA CATCTTCTTT CAAGCTTTCA 21420

AU GTTTTTCTA TGTTCTTAGC TGAATTTCTT TCTTACAGTAG CCTTTTCGCC ATCCTTGCAG GTACCCAAGG TTGCTTCCAA ATCCATGGTT 21492  
 Ref GTTTTTCTA TGTTCTTAGC TGAATTTCTT TCTTACAGTAG CCTTTTCGCC ATCCTTGCAG GTACCCAAGG TTGCTTCCAA ATCCATGGTT 21510

AU TCAATCCAGCG GCTTTCCATC TTCAAATTTG GACCTTTCTA GTCCTACATC TGATGAATTT TCTGCTGGCA GTGTTTTTTC TTTGCAAGCA 21582  
 Ref TCAATCCAGCG GCTTTCCATC TTCAAATTTG GACCTTTCTA GTCCTACATC TGATGAATTT TCTGCTGGCA GTGTTTTTTC TTTGCAAGCA 21600

AU TCGGTTTAT TCTCTAGTTC TCTATGTTCT TCACCAAGTAG AGACATTGGT GACATCTAGA TTAGATTCCCT CAGCCAAGTG TTCCTTGACT 21672  
 Ref TCGGTTTAT TCTCTAGTTC TCTATGTTCT TCACCAAGTAG AGACATTGGT GACATCTAGA TTAGATTCCCT CAGCCAAGTG TTCCTTGACT 21690

AU TCAATGTTAC TCTCGTTTCC TGTATCTTCA GGCTCAGCTT TAGGGACATC TGCTAGCGGA TTATCTTCAT TTAGAATTA TTTCTCATCC 21762  
 Ref TCAATGTTAC TCTCGTTTCC TGTATCTTCA GGCTCAGCTT TAGGGACATC TGCTAGCGGA TTATCTTCAT TTAGAATTA TTTCTCATCC 21780

AU GTTACTTGTG GCACTGGAGT TTCTGAGTGC TCACACAAAT CATGATCTTT TTCTGAAGTT TCATCAGTTA TTTTCTTTTC TTCAATGAGT 21852  
 Ref GTTACTTGTG GCACTGGAGT TTCTGAGTGC TCACACAAAT CATGATCTTT TTCTGAAGTT TCATCAGTTA TTTTCTTTTC TTCAATGAGT 21870

AU GTGGCCCTCAT ATTCTTTTAC TTCATCTCCT AGTATTTCTT TCAAGGGAAT CTCCTTGGTG GTCATCTCCA ATTGATCTTC ATTTTCTTCA 21942  
 Ref GTGGCCCTCAT ATTCTTTTAC TTCATCTCCT AGTATTTCTT TCAAGGGAAT CTCCTTGGTG GTCATCTCCA ATTGATCTTC ATTTTCTTCA 21960

AU TTGCGAAGTT TATCCTGCAT TGCATCTTCT TCTTTGGGAA TCTCCATGTC CTTCTCATGT GTTACGTATG AGTCCCTGA TTTTACATCA 22032  
 Ref TTGCGAAGTT TATCCTGCAT TGCATCTTCT TCTTTGGGAA TCTCCATGTC CTTCTCATGT GTTACGTATG AGTCCCTGA TTTTACATCA 22050

AU ATTTTCTGAC TGCTTACACC AATCTGTTCA TGTTCTGTTT TTGCTGAGCT GTTCTCTTCG ATGACAACAA CATTACATTT TTGGTCTTTT 22122  
 Ref ATTTTCTGAC TGCTTACACC AATCTGTTCA TGTTCTGTTT TTGCTGAGCT GTTCTCTTCG ATGACAACAA CATTACATTT TTGGTCTTTT 22140

AU TCTTTTTCTT GTTCAGCGTC AGCTTCTTTT ATATTTGTTT CTTCCGTTTC TGCTGATAT GATGCTGAGT TTTCTTCTT GGTATCGTTT 22212  
 Ref TCTTTTTCTT GTTCAGCGTC AGCTTCTTTT ATATTTGTTT CTTCCGTTTC TGCTGATAT GATGCTGAGT TTTCTTCTT GGTATCGTTT 22230

AU TTGGACTCCC CAAGCTCAAC TGAGGAAC TAAGGACATGAT CTTCTTTTAC TTCTATTGGT GCTATTTCTT CTTTTGACTC CTGTATAATA 22302  
 Ref TTGGACTCCC CAAGCTCAAC TGAGGAAC TAAGGACATGAT CTTCTTTTAC TTCTATTGGT GCTATTTCTT CTTTTGACTC CTGTATAATA 22320

AU TCAAACAGAC TAGAATTATT ATTTGGTTTT TCTGTTTCTT CTATGGACAC CGATTCTCG ATGATTGAGT TGCTAGTCTT TAAAAAATT 22392  
 Ref TCAAACAGAC TAGAATTATT ATTTGGTTTT TCTGTTTCTT CTATGGACAC CGATTCTCG ATGATTGAGT TGCTAGTCTT TAAAAAATT 22410

AU GAATATATAT GTTGATGGAA GATTGAGTTC AGAACAGTTG AGCTATTAGT GAGTCATACA ATCTACTTAC CTCTGTTATC GAAACCCTG 22482  
 Ref GAATATATAT GTTGATGGAA GATTGAGTTC AGAACAGTTG AGCTATTAGT GAGTCATACA ATCTACTTAC CTCTGTTATC GAAACCCTG 22500

AU CTGCAGTATT CTCTTCTTTA GCTTTTTTCAT CCATCGTCTC GGCCATTAA GTTGCTGAT CCTTCTTGT ATCTTCTCC TCTAGAATTT 22572  
Ref CTGCAGTATT CTCTTCTTTA GCTTTTTTCAT CCATCGTCTC GGCCATTAA GTTGCTGAT CCTTCTTGT ATCTTCTCC TCTAGAATTT 22590

AU GTTTTTCGGA ATTCTCAACT GTTGTGTCTG GTTCCAGCTT TTCACAGACC TGAACAAAA ATAATATCAA AAGTTCGGTG AAACATGGAG 22662  
Ref GTTTTTCGGA ATTCTCAACT GTTGTGTCTG GTTCCAGCTT TTCACAGACC TGAACAAAA ATAATATCAA AAGTTCGGTG AAACATGGAG 22680

AU GTTTTAGCT TTCAACTTGA TGTGAAAAA AAATAAAAAC TTCATCTTAA GAACTAGGCT CTTCAAATTT TTAGAAGTAA CATGAATTTT 22752  
Ref GTTTTAGCT TTCAACTTGA TGTGAAAAA AAATAAAAAC TTCATCTTAA GAACTAGGCT CTTCAAATTT TTAGAAGTAA CATGAATTTT 22770

AU ACCTCTACTT CAGGTGTGGC TTCATTTTCA TTTTCTTCTG TAGCTTTCAG TGAGTCATTG ATGATAGCAC ATTCTTCCCT CACAATGAAT 22842  
Ref ACCTCTACTT CAGGTGTGGC TTCATTTTCA TTTTCTTCTG TAGCTTTCAG TGAGTCATTG ATGATAGCAC ATTCTTCCCT CACAATGAAT 22860

AU GTTGAGCCTT CATGAACCTG CATGAAGAAC ATGGTGTACT TTTTAAACA ATTACAGTGC TAATCTTGGG GAAGTGTTTA AAATGTTTTT 22932  
Ref GTTGAGCCTT CATGAACCTG CATGAAGAAC ATGGTGTACT TTTTAAACA ATTACAGTGC TAATCTTGGG GAAGTGTTTA AAATGTTTTT 22950

AU AAAAGAACT TGAAGTGAAG TTAGTATTCA TTAGTCTTTT AAATCCAGAC CTCTTTGGTT TCTTCTGAT TTAAGTTATC TTCTACGTTT 23022  
Ref AAAAGAACT TGAAGTGAAG TTAGTATTCA TTAGTCTTTT AAATCCAGAC CTCTTTGGTT TCTTCTGAT TTAAGTTATC TTCTACGTTT 23040

AU TCCTTGGCAT CCTTTGGTAG TGCACCTTCTG TTCTCTGACT CCTGCTGTAT ACTCTCTTCT TTGTGTTCTA AAGCTTCATT TTCCACTGGT 23112  
Ref TCCTTGGCAT CCTTTGGTAG TGCACCTTCTG TTCTCTGACT CCTGCTGTAT ACTCTCTTCT TTGTGTTCTA AAGCTTCATT TTCCACTGGT 23130

AU TCAACATCGG AGAAGTTGTA CTGCTTTTTCG TGCTCATTGT CCATTAGTTG TCCAACGAAT GAGTCAGTAA CATGTAATC ATCAGCATT 23202  
Ref TCAACATCGG AGAAGTTGTA CTGCTTTTTCG TGCTCATTGT CCATTAGTTG TCCAACGAAT GAGTCAGTAA CATGTAATC ATCAGCATT 23220

AU TCGTTTAAA TCTCAACTTC CACGGTTTCA TTACTCTGAC TTGCTTATG TTGTAGTGG TCAGTTGGTG AGTCTTCCCT CGTTTGTCCC 23292  
Ref TCGTTTAAA TCTCAACTTC CACGGTTTCA TTACTCTGAC TTGCTTATG TTGTAGTGG TCAGTTGGTG AGTCTTCCCT CGTTTGTCCC 23310

AU TCGGATCTCT TGTGATGGTC TTTGACTGGT GTTGTCTTCT CAATGCCTGT GCTTGTCTCT GCAGTTTCGG CACAGATGGC AGTATTGACA 23382  
Ref TCGGATCTCT TGTGATGGTC TTTGACTGGT GTTGTCTTCT CAATGCCTGT GCTTGTCTCT GCAGTTTCGG CACAGATGGC AGTATTGACA 23400

AU TCCTCAGAAA CTGCATTCCA AGGACATGCA CGGTTCTCCT TTTCCGGTTC ATTCTTTTGC TTGAAGCTCT CCTCTAGGAT TTCTGCTTTC 23472  
Ref TCCTCAGAAA CTGCATTCCA AGGACATGCA CGGTTCTCCT TTTCCGGTTC ATTCTTTTGC TTGAAGCTCT CCTCTAGGAT TTCTGCTTTC 23490

AU TTGGAATTTT CCTCCTGATT CTTCTGTGCG AGACCAATAT TTTCTACTTC ACTAATTTCT CCTTCAGGCA TTGGAACAAT GGATTCCTTT 23562  
Ref TTGGAATTTT CCTCCTGATT CTTCTGTGCG AGACCAATAT TTTCTACTTC ACTAATTTCT CCTTCAGGCA TTGGAACAAT GGATTCCTTT 23580

AU TCCTTTCTCA TTTCTTCCGA TCCCTTTTGT ATAGCGAGCC CCTCGCCTGT CACCTGTACA ACTTTCACAT CCACCACAAC ATTTTCTGAG 23652  
Ref TCCTTTCTCA TTTCTTCCGA TCCCTTTTGT ATAGCGAGCC CCTCGCCTGT CACCTGTACA ACTTTCACAT CCACCACAAC ATTTTCTGAG 23670

AU TGCTTTTGTG GAGCTTGATC TTCTTCAGAA GTTTCATCAA CTAATTTCT CACTTCTAAG AGAGTTGCAT CGTTTTCTTC TGAATGCATA 23742  
Ref TGCTTTTGTG GAGCTTGATC TTCTTCAGAA GTTTCATCAA CTAATTTCT CACTTCTAAG AGAGTTGCAT CGTTTTCTTC TGAATGCATA 23760

AU GCAGAATGTT CCTTAACATC ATCTCCTAAT ATATCTTTCA ACAGAATCT GTCCGGTTGC ATTTCCATTT GATTTTCACT GCCTGCATT 23832  
Ref GCAGAATGTT CCTTAACATC ATCTCCTAAT ATATCTTTCA ACAGAATCT GTCCGGTTGC ATTTCCATTT GATTTTCACT GCCTGCATT 23850

AU AGAATTTTAT CCTGCATTCT ATCTTCTTCT TGGGGAATAT CTCTGTCTTT CTCACCTGTC ATGCACGATT CTGCTGATTT TGCATCAATG 23922  
Ref AGAATTTTAT CCTGCATTCT ATCTTCTTCT TGGGGAATAT CTCTGTCTTT CTCACCTGTC ATGCACGATT CTGCTGATTT TGCATCAATG 23940

AU TCAGCACCTT CTAACCATT CCCATGATCT TCACCATCAA CGACATTATT TATTTTCTTC TTTTCTCGT CTTCTTCTGC TTCGGCTTTA 24012  
Ref TCAGCACCTT CTAACCATT CCCATGATCT TCACCATCAA CGACATTATT TATTTTCTTC TTTTCTCGT CTTCTTCTGC TTCGGCTTTA 24030

AU GCTTCCCTTA AGTTTGTGG TAACATTTCC GCTGCTTGTG AAGTGCAGTC CAAATCAGCA GTATCAATAT GTTCTTTTAC TGCTGTTGCT 24102  
Ref GCTTCCCTTA AGTTTGTGG TAACATTTCC GCTGCTTGTG AAGTGCAGTC CAAATCAGCA GTATCAATAT GTTCTTTTAC TGCTGTTGCT 24120

AU TCTTCAGTAT CCATTTTAGA CTCCTTGGGC TCAAACGAAG AGCTGCAGAC AAGTCTTCTT TTGACTTCCA TTAGAGTTAT TTCTTCTTTT 24192  
Ref TCTTCAGTAT CCATTTTAGA CTCCTTGGGC TCAAACGAAG AGCTGCAGAC AAGTCTTCTT TTGACTTCCA TTAGAGTTAT TTCTTCTTTT 24210

AU GCTGTACCCA AAGCTTCCGT TTCTGATCCT TCACATGCCT TCACGATAAA CAAAATTTCA ATATAAACAT GATAAAGTTC CAGATGGTTA 24282  
Ref GCTGTACCCA AAGCTTCCGT TTCTGATCCT TCACATGCCT TCACGATAAA CAAAATTTCA ATATAAACAT GATAAAGTTC CAGATGGTTA 24300

AU CAGACTATTA TAAGACAAAT TCCAACAGGT CACGGGTCACT CTTAGTGCTA AGTTAATGAA CTGAATTTT TATCCTTTGA AATCCCAGTT 24372  
Ref CAGACTATTA TAAGACAAAT TCCAACAGGT CACGGGTCACT CTTAGTGCTA AGTTAATGAA CTGAATTTT TATCCTTTGA AATCCCAGTT 24390

AU ATCTTGTGGT TTGCTTGTG GCATCAGTTG CTTTCATGACA TCTCCTATTG TGAAGCTCTT TTTTGGCCT TCTCTTTTCT GAATTTGATC 24462  
Ref ATCTTGTGGT TTGCTTGTG GCATCAGTTG CTTTCATGACA TCTCCTATTG TGAAGCTCTT TTTTGGCCT TCTCTTTTCT GAATTTGATC 24480

AU TGAATTTACT CGGCTCTATT ACTTTTACAC TGTTTAAATGG ATAGTCTTTC GATGGGGCAT AAGACTTCTG GTTGTGCTGT TTTGCATTGT 24552  
Ref TGAATTTACT CGGCTCTATT ACTTTTACAC TGTTTAAATGG ATAGTCTTTC GATGGGGCAT AAGACTTCTG GTTGTGCTGT TTTGCATTGT 24570

AU ATGCATGTGT ATGCCAAAGA TTTTATTTG TTCCATGTCT ATTGATGGAA GTTCGAGTTC AGAAATATAT TATAAGTTTG AAGTTTGAAG 24642  
Ref ATGCATGTGT ATGCCAAAGA TTTTATTTG TTCCATGTCT ATTGATGGAA GTTCGAGTTC AGAAATATAT TATAAGTTTG AAGTTTGAAG 24660

AU ATTAGAGAGT CATATAATTT TCTTACCTCT TTAAGTGAAT TCTGATCATT GTTGGTGTCT TCCTCTAGAA TTTGTTTTCC ATCATTCTCA 24732  
Ref ATTAGAGAGT CATATAATTT TCTTACCTCT TTAAGTGAAT TCTGATCATT GTTGGTGTCT TCCTCTAGAA TTTGTTTTCC ATCATTCTCA 24750

24,760 24,780 24,800 24,820 24,840  
 AU ACTGTTGT CCAGTTCCAG CTTTTCAGTG ACCTGATTGA AAATATATTG AGAGATTGGT TAAAAATGGA GCTTTCAGAT TTTAACAAA 24822  
 Ref ACTGTTGT CCAGTTCCAG CTTTTCAGTG ACCTGATTGA AAATATATTG AGAGATTGGT TAAAAATGGA GCTTTCAGAT TTTAACAAA 24840  
 24,860 24,880 24,900 24,920  
 AU AAATTGAAAT TGAGTTAGTA TTATGATCTA GAATCAGACC TCTTTAGTTT CTTGCTGTTT CAAGTTATCT TCTATGTGAT CATTAGCTC 24912  
 Ref AAATTGAAAT TGAGTTAGTA TTATGATCTA GAATCAGACC TCTTTAGTTT CTTGCTGTTT CAAGTTATCT TCTATGTGAT CATTAGCTC 24930  
 24,940 24,960 24,980 25,000 25,020  
 AU TTGCTGTATC CCCTTGTGTT TGTGTTTAA AGCTTCACTG CACTCTGAGC CATTTCGGGA GTTCAAGTGA TATGCCCTTT TTATAAACAT 25002  
 Ref TTGCTGTATC CCCTTGTGTT TGTGTTTAA AGCTTCACTG CACTCTGAGC CATTTCGGGA GTTCAAGTGA TATGCCCTTT TTATAAACAT 25020  
 25,040 25,060 25,080 25,100  
 AU TGTGTTTTCA TTGCCCATTT CACTTGTTC AGATTTTAA TCTGTTGCTG CTGTTTCTGT GAATATGTGC TCTGGAATTG TGTAACTACT 25092  
 Ref TGTGTTTTCA TTGCCCATTT CACTTGTTC AGATTTTAA TCTGTTGCTG CTGTTTCTGT GAATATGTGC TCTGGAATTG TGTAACTACT 25110  
 25,120 25,140 25,160 25,180 25,200  
 AU GCTTTGACTT GCTTTAGAGG CATCTTCAC AACTTTTTCC TTCTCCTTGA CTGCAACCAT TGCATCATTG AATTGTTTCA TGGGTTGAAC 25182  
 Ref GCTTTGACTT GCTTTAGAGG CATCTTCAC AACTTTTTCC TTCTCCTTGA CTGCAACCAT TGCATCATTG AATTGTTTCA TGGGTTGAAC 25200  
 25,220 25,240 25,260 25,280  
 AU ATCGGAGAAC TCAAACGCT TTTCACTCT GTTTTCAGCT GATTGTTGAA CTGATGAATC AGTAACATGT AAATCATCAG CATTGTCATT 25272  
 Ref ATCGGAGAAC TCAAACGCT TTTCACTCT GTTTTCAGCT GATTGTTGAA CTGATGAATC AGTAACATGT AAATCATCAG CATTGTCATT 25290  
 25,300 25,320 25,340 25,360 25,380  
 AU TGAAATCTCA AGTTCCATAG TTTTGGTATT CTGGTTTACT TCATTTTTTT GGTTTGGT TGATGAGTCT TCCCTCCCTT CTCTCTCGGA 25362  
 Ref TGAAATCTCA AGTTCCATAG TTTTGGTATT CTGGTTTACT TCATTTTTTT GGTTTGGT TGATGAGTCT TCCCTCCCTT CTCTCTCGGA 25380  
 25,400 25,420 25,440 25,460  
 AU TCTTTCTTCA TGGTTTTCA CTGATGTTTT TTCTCTGATG CTTGTGCTTG TTTCTGTAGT TTCACGAGAG ACGGCAGTAT TGACATCCTC 25452  
 Ref TCTTTCTTCA TGGTTTTCA CTGATGTTTT TTCTCTGATG CTTGTGCTTG TTTCTGTAGT TTCACGAGAG ACGGCAGTAT TGACATCCTC 25470  
 25,480 25,500 25,520 25,540 25,560  
 AU ATGAACTACA TTCAGGGGAC ATGAAAGCAT CTCCTTTTCG GGTTCATTTT TCTGCTGGAT TGGGATCTCT TCCTCCGGTT TTCTTCAGG 25542  
 Ref ATGAACTACA TTCAGGGGAC ATGAAAGCAT CTCCTTTTCG GGTTCATTTT TCTGCTGGAT TGGGATCTCT TCCTCCGGTT TTCTTCAGG 25560  
 25,580 25,600 25,620 25,640 25,660  
 AU CATAAGAAC GTGGATTCT CTTCCCTTTT CATTTCATCT AATGCCCCAG TTAGTCCCGG CTTTTTGTCT GTGTCTGGTA CAACTCCAT 25632  
 Ref CATAAGAAC GTGGATTCT CTTCCCTTTT CATTTCATCT AATGCCCCAG TTAGTCCCGG CTTTTTGTCT GTGTCTGGTA CAACTCCAT 25650  
 25,680 25,700 25,720 25,740  
 AU GTCCACTGCA ATCTTTTCTA AGTGCTTATA CGCCCTATCT TTTTCCAAAG TTTTCACTGT TATTTTCTT TCTTCAGTGG TTTCTATTTC 25722  
 Ref GTCCACTGCA ATCTTTTCTA AGTGCTTATA CGCCCTATCT TTTTCCAAAG TTTTCACTGT TATTTTCTT TCTTCAGTGG TTTCTATTTC 25740  
 25,760 25,780 25,800 25,820  
 AU TTCTGAAGGA ATGGTAGAAT GTTCCCTAAC TTCATCTCCT ATTGCTTCTT TCAAGGGAAC ATCCTCAGTG GTCATCTCCA TTCTATCTTC 25812  
 Ref TTCTGAAGGA ATGGTAGAAT GTTCCCTAAC TTCATCTCCT ATTGCTTCTT TCAAGGGAAC ATCCTCAGTG GTCATCTCCA TTCTATCTTC 25830  
 25,840 25,860 25,880 25,900 25,920  
 AU ACTTACTGCA TTCGGAATTT TATCCTGCAT TCCATCTTCT TCTTGGGGTT TGGGAGCCTC CACGTTTCTT TCGCATGTTA CAGAGAAATC 25902  
 Ref ACTTACTGCA TTCGGAATTT TATCCTGCAT TCCATCTTCT TCTTGGGGTT TGGGAGCCTC CACGTTTCTT TCGCATGTTA CAGAGAAATC 25920  
 25,940 25,960 25,980 26,000  
 AU CATTGAATTC ACATCAATGT TAGCACCTTC TACACTGACC ATGTCATGTT CAGTTGTGGC TAGGCCAATC TCTTTGACCG CAACAACATT 25992  
 Ref CATTGAATTC ACATCAATGT TAGCACCTTC TACACTGACC ATGTCATGTT CAGTTGTGGC TAGGCCAATC TCTTTGACCG CAACAACATT 26010  
 26,020 26,040 26,060 26,080 26,100  
 AU CTTTTCCCA TCTGCTTCAT CTTCTTTTAC TGATGTTTTCT TCTTCAGTGT CCATTCTGGA TTCCTTGAGC TCAAACGACG AGCCACGAAC 26082  
 Ref CTTTTCCCA TCTGCTTCAT CTTCTTTTAC TGATGTTTTCT TCTTCAGTGT CCATTCTGGA TTCCTTGAGC TCAAACGACG AGCCACGAAC 26100  
 26,120 26,140 26,160 26,180  
 AU AAGGTCCTCT TCGAGGGTTT GTTGTATTTT TTCTTTTAC TCCTTTTCA CAAATGGACT TGGATCATTG TCTCGCTTTG CTCTTTGCTC 26172  
 Ref AAGGTCCTCT TCGAGGGTTT GTTGTATTTT TTCTTTTAC TCCTTTTCA CAAATGGACT TGGATCATTG TCTCGCTTTG CTCTTTGCTC 26190  
 26,200 26,220 26,240 26,260 26,280  
 AU TATAGAGTCC ATTTCCGTGA CTTTCGAGTT GGTAGCCTGT ATAACAATTG AGCGGGTAAG TTAACAACAA ATAATTGTAC GAAAGGAAAA 26262  
 Ref TATAGAGTCC ATTTCCGTGA CTTTCGAGTT GGTAGCCTGT ATAACAATTG AGCGGGTAAG TTAACAACAA ATAATTGTAC GAAAGGAAAA 26280  
 26,300 26,320 26,340 26,360  
 AU GAATTGTTGG ACCTAAATTA ACTATCATTG TTAGCTGACC TCTTCTGTCA ACTTCATTAG GCTGCTTTC ACTTGCTTCA TGTTTTCTC 26352  
 Ref GAATTGTTGG ACCTAAATTA ACTATCATTG TTAGCTGACC TCTTCTGTCA ACTTCATTAG GCTGCTTTC ACTTGCTTCA TGTTTTCTC 26370  
 26,380 26,400 26,420 26,440 26,460  
 AU TGCAATTTCA TCTGTAATTG ACGAATCAGA GATGTCAGGT ATTGGATGGT TCTTTGTTTC CGGATTTTCT TTTCCGGTAC CTGGAGCCTC 26442  
 Ref TGCAATTTCA TCTGTAATTG ACGAATCAGA GATGTCAGGT ATTGGATGGT TCTTTGTTTC CGGATTTTCT TTTCCGGTAC CTGGAGCCTC 26460  
 26,480 26,500 26,520 26,540 26,560  
 AU CATTCTGAT TCTTCATGGA CCTGCATGAA AAAACACAAT TTTGATTTAA CTACGACAAA TTAGTAGAAG GTAACAGATC AGATTATAAA 26532  
 Ref CATTCTGAT TCTTCATGGA CCTGCATGAA AAAACACAAT TTTGATTTAA CTACGACAAA TTAGTAGAAG GTAACAGATC AGATTATAAA 26550  
 26,580 26,600 26,620 26,640  
 AU CAAGAACA AAA CTTGAAGTAG GATAAAGCAA AAAAAGTGT TAAATGCAGA GTGTGGTACA AGATGGTCCG GGCTGCTGT TCTGCATGTT 26622  
 Ref CAAGAACA AAA CTTGAAGTAG GATAAAGCAA AAAAAGTGT TAAATGCAGA GTGTGGTACA AGATGGTCCG GGCTGCTGT TCTGCATGTT 26640  
 26,660 26,680 26,700 26,720  
 AU GTGCATGTGT GTGGATAATG ATTTTTTTTG TCATGCCCTT CGTGGAAATT CGAGTTTGGG TATACTGAAT AAGTGAGAAG TTCAGAGATC 26712  
 Ref GTGCATGTGT GTGGATAATG ATTTTTTTTG TCATGCCCTT CGTGGAAATT CGAGTTTGGG TATACTGAAT AAGTGAGAAG TTCAGAGATC 26730  
 26,740 26,760 26,780 26,800 26,820  
 AU AGTATGTCAT ATAATCTACT TACCTTTTTA ACAGACATCG TTTCCCTCCC ATCTCCCTCA GATCTGTCTT CATGGTCTTT GACAGATGTT 26802  
 Ref AGTATGTCAT ATAATCTACT TACCTTTTTA ACAGACATCG TTTCCCTCCC ATCTCCCTCA GATCTGTCTT CATGGTCTTT GACAGATGTT 26820  
 26,840 26,860 26,880 26,900 26,920  
 AU GCCTCTTCTGA TGCCTTGTCT TGTTTTTGCA GTTTCACCAG AGATGTCAAT ATTTGCATCT TTGTAAGTCT CATTATAGG ATTTGCAGGC 26892  
 Ref GCCTCTTCTGA TGCCTTGTCT TGTTTTTGCA GTTTCACCAG AGATGTCAAT ATTTGCATCT TTGTAAGTCT CATTATAGG ATTTGCAGGC 26910  
 26,940 26,960 26,980 27,000  
 AU TTCTCATTTG GGGTTGAAAC ATGTTCTGCT TCAGTAACGT ATTTCTTATG CATTGCAATT GCGGATTCCT CATCTATTTT CATTTCATCT 26982  
 Ref TTCTCATTTG GGGTTGAAAC ATGTTCTGCT TCAGTAACGT ATTTCTTATG CATTGCAATT GCGGATTCCT CATCTATTTT CATTTCATCT 27000

AU GATGCCTCCG TCACGGCCAG CTCCTTGTCT GCTGCCTGTA TTGCGTCCAC TGCAACCTTT TCAGATTGAG AGTTTGCATC ATCCTTACAT 27072  
 Ref GATGCCTCCG TCACGGCCAG CTCCTTGTCT GCTGCCTGTA TTGCGTCCAC TGCAACCTTT TCAGATTGAG AGTTTGCATC ATCCTTACAT 27090

AU AATTCATTTG ACGTGCTGAA ATCTTGGTCA GTTTTCTCAT CAATCTCACA TTGTCCAGTT TCTTCTCTTG TACACTCTTC AACAAATATTC 27162  
 Ref AATTCATTTG ACGTGCTGAA ATCTTGGTCA GTTTTCTCAT CAATCTCACA TTGTCCAGTT TCTTCTCTTG TACACTCTTC AACAAATATTC 27180

AU TCCATCCTGA TATCAGAGGC TTGAGAATGC AGCTCTTTGG TTTTCTTGAT GGAAGAAGTA TCGAACAAAT TCTCATCTTG GCTGGCATCA 27252  
 Ref TCCATCCTGA TATCAGAGGC TTGAGAATGC AGCTCTTTGG TTTTCTTGAT GGAAGAAGTA TCGAACAAAT TCTCATCTTG GCTGGCATCA 27270

AU TTTTCTCCAT TGACGCATTT GTTCTCTTCA GGTTTCATGTA CGCAAGCAAC CTCTTTCATT TCAGCTACCA TTGAGGGTAA GTTGTTCCT 27342  
 Ref TTTTCTCCAT TGACGCATTT GTTCTCTTCA GGTTTCATGTA CGCAAGCAAC CTCTTTCATT TCAGCTACCA TTGAGGGTAA GTTGTTCCT 27360

AU ATTGGATTAT GAGAATCCAT TGAAGCTTGT TTCTCGAGTT CTTCACTGCC ATGATCCATG TCACCCTTTT CAATTCGGTC TTGAGTTCGG 27432  
 Ref ATTGGATTAT GAGAATCCAT TGAAGCTTGT TTCTCGAGTT CTTCACTGCC ATGATCCATG TCACCCTTTT CAATTCGGTC TTGAGTTCGG 27450

AU TCCTCTTCTT CGATACGAAC CACTGTTTTT TCTTTGTCTT CTAGTATCTT CTCTTCTTTA AATGGAGTGC CATCCACCTC TGTGTGTCT 27522  
 Ref TCCTCTTCTT CGATACGAAC CACTGTTTTT TCTTTGTCTT CTAGTATCTT CTCTTCTTTA AATGGAGTGC CATCCACCTC TGTGTGTCT 27540

AU AATATTCCAC TGGTCTCATT GGC AACCATG GAAATCTCAG GTGATACTAA AAAACTTTC A C C C T T A G A A T T C C A G T A T T G C C T T C A G T G 27612  
 Ref AATATTCCAC TGGTCTCATT GGC AACCATG GAAATCTCAG GTGATACTAA AAAACTTTC A C C C T T A G A A T T C C A G T A T T G C C T T C A G T G 27630

AU ATGATATGTG CCGTTTCGAT CCCCCTTATTA TCGGCAGTA CTTCCAAAGT CAAGTGCTTG CTCTCTGCTG TTTTCTGCAT GAAGAAAAACA 27702  
 Ref ATGATATGTG CCGTTTCGAT CCCCCTTATTA TCGGCAGTA CTTCCAAAGT CAAGTGCTTG CTCTCTGCTG TTTTCTGCAT GAAGAAAAACA 27720

AU AAGCTTTTAT TTTCAATTTAC ATATGTGGTA TTTATTTCTT GGAAGAATAA GCTTCTTTGG TAACAAAAAA AATGGCATA C T T A A A T C T A T 27792  
 Ref AAGCTTTTAT TTTCAATTTAC ATATGTGGTA TTTATTTCTT GGAAGAATAA GCTTCTTTGG TAACAAAAAA AATGGCATA C T T A A A T C T A T 27810

AU TTCTGGTAAT TGTTCCTGT CCTATGTAAT ATTTAAAGTA GTTGGCTGTC AGATAACAGT TGGCAATTTT GGACATGAAC TATAGACGTG 27882  
 Ref TTCTGGTAAT TGTTCCTGT CCTATGTAAT ATTTAAAGTA GTTGGCTGTC AGATAACAGT TGGCAATTTT GGACATGAAC TATAGACGTG 27900

AU AAAGAATAAC GTGAACATTC TCGAGACTCG GTCTATAATG TCTCGAGACA CATTGATGAA TTTTGTTAAT TTGAATTGGA TTTGAATCTT 27972  
 Ref AAAGAATAAC GTGAACATTC TCGAGACTCG GTCTATAATG TCTCGAGACA CATTGATGAA TTTTGTTAAT TTGAATTGGA TTTGAATCTT 27990

AU TGACTTCGAG TTTGATACTG TATAACACGG GATTTCTGTT ATGCATGACC ATATCCGTAA TTGAAAGTGG TTTGAATTAAT GTCATGTCGG 28062  
 Ref TGACTTCGAG TTTGATACTG TATAACACGG GATTTCTGTT ATGCATGACC ATATCCGTAA TTGAAAGTGG TTTGAATTAAT GTCATGTCGG 28080

AU AGGTGGTTGT GCAAGCATCG TGAACACAAT ACAAAACATTG TCCTCTTGGG GGGTCGACTA ACCCTCGAG GCTTTCATTC AATGGCGTGT 28152  
 Ref AGGTGGTTGT GCAAGCATCG TGAACACAAT ACAAAACATTG TCCTCTTGGG GGGTCGACTA ACCCTCGAG GCTTTCATTC AATGGCGTGT 28170

AU CTCCTTGGAT TTGAAACCAA CACTTCTAC AACACATATA GTAGTCTATC TTGAAAACAT AGTACCGTTT GATCTTTGCA AAAAAGACCG 28242  
 Ref CTCCTTGGAT TTGAAACCAA CACTTCTAC AACACATATA GTAGTCTATC TTGAAAACAT AGTACCGTTT GATCTTTGCA AAAAAGACCG 28260

AU CTATATATAT GTGTTATAGG AGGTCTTAGG TTCAATCCAA CTAAGCGCAT CTTTAGGTGA GAAAGCTTTT ACGAGGGTTA GTGGACGCTC 28332  
 Ref CTATATATAT GTGTTATAGG AGGTCTTAGG TTCAATCCAA CTAAGCGCAT CTTTAGGTGA GAAAGCTTTT ACGAGGGTTA GTGGACGCTC 28350

AU AAAGAAGACA ATTTGCTCT CAATGCCCGT GTAACACAGC CTATGGCTGG TCAATGGTG ATAGGTCGTG ACAATTAATTT TTTAGAAAAAG 28422  
 Ref AAAGAAGACA ATTTGCTCT CAATGCCCGT GTAACACAGC CTATGGCTGG TCAATGGTG ATAGGTCGTG ACAATTAATTT TTTAGAAAAAG 28440

AU AGATTTAGCT TGTCTTTAAT GTTAGTGTGA GTATCTGGTA CGGATATGTG CCGGATACGT GTTCAATTTT CTTTTTCCAA GTTTTCCTTG 28512  
 Ref AGATTTAGCT TGTCTTTAAT GTTAGTGTGA GTATCTGGTA CGGATATGTG CCGGATACGT GTTCAATTTT CTTTTTCCAA GTTTTCCTTG 28530

AU TATTTCTAAA GAGAACCTGT TGATGCATGA ACCTTGCATC AACAGATCTA AAAATATATG CTTACTACCT TCTTTAAGCT GATTGAAAAAC 28602  
 Ref TATTTCTAAA GAGAACCTGT TGATGCATGA ACCTTGCATC AACAGATCTA AAAATATATG CTTACTACCT TCTTTAAGCT GATTGAAAAAC 28620

AU CGGAGATTAT GTGCTTCATC AATCAACTAG AAGGATAGTA ATAGAACCTA GAGATCCTCC AGTTTTAAGT GTTTCACCAA CACCGAAAAA 28692  
 Ref CGGAGATTAT GTGCTTCATC AATCAACTAG AAGGATAGTA ATAGAACCTA GAGATCCTCC AGTTTTAAGT GTTTCACCAA CACCGAAAAA 28710

AU CTCAAAAACA GAAGTGCTAT TTAAGATGA AACCTGACGC ATGATCTTTC TGGTTAATC TGTATCAAAA GACATCTGAT CTTTGTATGAC 28782  
 Ref CTCAAAAACA GAAGTGCTAT TTAAGATGA AACCTGACGC ATGATCTTTC TGGTTAATC TGTATCAAAA GACATCTGAT CTTTGTATGAC 28800

AU GTAGAGTGT CTAAGTTTG CTTAAAGCAC AATACGTGTA AGATGAAAGA ACATTACCAC TATTGAAATG GGCTCTTGAA TGATCACTGC 28872  
 Ref GTAGAGTGT CTAAGTTTG CTTAAAGCAC AATACGTGTA AGATGAAAGA ACATTACCAC TATTGAAATG GGCTCTTGAA TGATCACTGC 28890

AU TCCAGTTGCC ATTTTTCTT GCACAAGTTA TCGAATTCTA GTTTGAGAGC CTATCATATC AAACATTCAT AAACGTGAA TCGATGAAGA 28962  
 Ref TCCAGTTGCC ATTTTTCTT GCACAAGTTA TCGAATTCTA GTTTGAGAGC CTATCATATC AAACATTCAT AAACGTGAA TCGATGAAGA 28980

AU TGAAGAAGCT TTACCCTAT GGAATGGGT TCTTGAATAA TCACTGATTC AGTTGCAATT TTTTCTGCA CAAGTGATCG AATTCGAGTT 29052  
 Ref TGAAGAAGCT TTACCCTAT GGAATGGGT TCTTGAATAA TCACTGATTC AGTTGCAATT TTTTCTGCA CAAGTGATCG AATTCGAGTT 29070

AU CAAGAACACT GAACAATACT GCCTATCATC CTGAAACATT CATAAACCAT GAATCATATA AGATGAAAGA ACTTTACCAC TATGGAACC 29142  
 Ref CAAGAACACT GAACAATACT GCCTATCATC CTGAAACATT CATAAACCAT GAATCATATA AGATGAAAGA ACTTTACCAC TATGGAACC 29160

AU GGTTCTTGAA TGATCGCTGC TTCAGTTGCC ATCTACTTTT CCTGCAGATA TAATAGAATT CG 29204  
 Ref GGTTCTTGAA TGATCGCTGC TTCAGTTGCC ATCTACTTTT CCTGCAGATA TAATAGAATT CG 29222
